1 **LARGE, an AMPA receptor interactor, plays a large role in long-term**  
2 **memory formation by driving homeostatic scaling-down**

3

4 Bo Am Seo<sup>2</sup>, Taesup Cho<sup>1</sup>, Daniel Z. Lee<sup>3</sup>, Hwa Young Lee<sup>1</sup>, Joong-Jae Lee<sup>1</sup>, Boyoung  
5 Lee<sup>1</sup>, Seong-Wook Kim<sup>1</sup>, Kathryn A. Cunningham<sup>4,5</sup>, Kelly T. Dineley<sup>4,6</sup>, Thomas A. Green<sup>4,5</sup>,  
6 Ho Min Kim<sup>2</sup>, Se-Young Choi<sup>7</sup>, Hee-Sup Shin<sup>1</sup>, and Myoung-Goo Kang<sup>1,2,3,4,\*</sup>

7

8 <sup>1</sup>Center for Cognition and Sociality, Institute for Basic Science (IBS), Daejeon 34141,  
9 Republic of Korea

10 <sup>2</sup>Biomedical Science & Engineering Interdisciplinary Program, Korea Advanced Institute of  
11 Science and Technology (KAIST), Daejeon 34141, ROK

12 <sup>3</sup>Department of Neuroscience and Cell Biology, <sup>4</sup>Center for Addiction Research,

13 <sup>5</sup>Department of Pharmacology & Toxicology, <sup>6</sup>Department of Neurology, University of Texas  
14 Medical Branch (UTMB), Galveston, TX 77555, USA

15 <sup>7</sup>Department of Physiology, Seoul National University School of Dentistry, Seoul 03080,  
16 Korea

17

18

19 \*Correspondence: [mkang13@gmail.com](mailto:mkang13@gmail.com)

20 **Abstract**

21

22 Dynamic trafficking of AMPA-type glutamate receptor (AMPA-R) in neuronal cells is a key  
23 cellular mechanism for learning and memory in the brain, which is regulated by AMPA-R  
24 interacting proteins. LARGE, a protein associated with intellectual disability, was found to  
25 be a novel component of the AMPA-R protein complex in our proteomic study. Here, our  
26 functional study of LARGE showed that during homeostatic scaling-down, increased LARGE  
27 expression at the Golgi apparatus (Golgi) negatively controlled AMPA-R trafficking from the  
28 Golgi to the plasma membrane, leading to downregulated surface and synaptic AMPA-R  
29 targeting. In *LARGE* knockdown mice, long-term potentiation (LTP) was occluded by  
30 synaptic AMPA-R overloading, resulting in impaired long-term memory formation. These  
31 findings indicate that the fine-tuning of AMPA-R trafficking by LARGE at the Golgi is critical  
32 for memory stability in the brain. Our study thus provides novel insights into the  
33 pathophysiology of brain disorders associated with intellectual disability.

34

35

## 36 Introduction

37 *LARGE* is expressed strongly in the brain (particularly the hippocampus), relative to other  
38 tissues(**Peyrard et al., 1999**). In humans, mutations in *LARGE* are associated with  
39 congenital muscular dystrophy type 1D, which is characterized by clinical features including  
40 profound intellectual disability, abnormal electroretinogram findings, and subtle structural  
41 brain abnormalities (**Clarke et al., 2011; Longman et al., 2003; Vaillend et al., 2008; Lisi  
42 and Cohn, 2007**). *Large<sup>myd</sup>* mice, which carry a natural truncation mutation of *LARGE*,  
43 exhibit a number of neurological phenotypes, including sensorineural deafness and  
44 defective retinal transmission, along with developmental brain abnormalities (**Holzfeind et  
45 al., 2002; Michele et al., 2002**) and impaired long-term potentiation (LTP) (**Satz et al., 2010**).  
46 These human and mouse studies suggest that abnormal synaptic function may be  
47 responsible for intellectual disabilities in human patients with *LARGE* mutations.

48 In our previous proteomic analysis, we found that *LARGE* forms a protein complex with  
49 the AMPA-type glutamate receptor (AMPA-R) (**Kang et al., 2012**). Excitatory glutamatergic  
50 synaptic transmission within the central nervous system is primarily mediated by AMPA-R,  
51 as well as NMDA-type glutamate receptor (NMDA-R), and increasing numbers of proteins  
52 have been found to form complexes with and thus regulate the dynamic trafficking of AMPA-  
53 R. This tight regulation of AMPA-R trafficking in and out of the synapses, mediated by  
54 AMPA-R interactors, is widely considered to be a central brain mechanism involved in  
55 information storage (**Hanley, 2010**).

56 Changes in neuronal activity can alter synaptic transmission efficacy. This phenomenon,  
57 known as synaptic plasticity, is a main mechanism underlying learning and memory in the  
58 brain. Several forms of synaptic plasticity, including Hebbian, homeostatic, and structural,  
59 have been identified. Hebbian synaptic plasticity involves acute adaptations of neurons in

60 the brain during learning and memory processes (including LTP), wherein repeated neuronal  
61 stimulation causes changes in synaptic efficacy. Homeostatic synaptic plasticity involves the  
62 chronic adaptation of neurons against prolonged changes in neuronal activity and is required  
63 for stability of encoded memory in the brain. Structural synaptic plasticity describes changes  
64 in the lengths, shapes, and numbers of neuronal dendrites and dendritic spines. Notably,  
65 AMPA-R trafficking plays critical roles in all three types of synaptic plasticity. Therefore, our  
66 understanding of synaptic plasticity, learning and memory, and cognitive brain function relies  
67 on knowledge about the molecular mechanisms underlying AMPA-R trafficking regulation  
68 **(Huganir and Nicoll, 2013)**.

69 Our functional study of LARGE revealed a novel and robust cellular mechanism  
70 underlying AMPA-R trafficking from the Golgi to the cell surface, which contributes to all  
71 three types of synaptic plasticity. LARGE is necessary for synaptic scaling-down, a type of  
72 homeostatic plasticity. Specifically, it downregulates the synaptic targeting of AMPA-R by  
73 negatively modulating AMPA-R trafficking from the Golgi to the cell surface. Synaptic AMPA-  
74 R overloading due to LARGE deficiency causes hippocampal LTP occlusion and the  
75 abnormal enlargement of dendritic spines, resulting in abrogated long-term memory  
76 formation. LARGE thus contributes to the stability of encoded memory by fine-tuning AMPA-  
77 R trafficking at the Golgi in the hippocampal neurons.

78

79

80

81

82

## 83 **Results**

84

### 85 **LARGE is necessary for neuronal homeostatic scaling-down**

86 Previous studies of LARGE have suggested a role for this protein in synaptic plasticity  
87 (**Clarke et al., 2011; Holzfeind et al., 2002; Lisi and Cohn, 2007; Longman et al., 2003;**  
88 **Michele et al., 2002; Peyrard et al., 1999; Satz et al., 2010; Vaillend et al., 2008**). Our  
89 proteomic study identified LARGE as a component of the AMPA-R protein complex (**Kang**  
90 **et al., 2012**), a major player in synaptic plasticity via dynamic trafficking in and out of the  
91 neuronal surface and synapse. To determine whether LARGE could regulate AMPA-R  
92 trafficking, we selected a homeostatic scaling method that would allow the monitoring of  
93 surface and synaptic AMPA-R trafficking in response to changes in neuronal activity  
94 (**Turrigiano, 2008**).

95 First, we monitored LARGE protein expression in cultured hippocampal neurons treated  
96 with either tetrodotoxin (TTX) or bicuculline for 48 h to induce homeostatic scaling-up and  
97 scaling-down, respectively (**Turrigiano, 2008**), which were confirmed by monitoring  
98 changes in GluA1 surface localization (i.e., expected increases and decreases in response  
99 to TTX or bicuculline treatment, respectively) through cell surface biotinylation. Interestingly,  
100 bicuculline treatment led to a significant increase in LARGE expression, whereas TTX had  
101 no effect on LARGE (**Figure 1A and Figure 1-figure supplement 2A**). We more carefully  
102 analyzed this increase in LARGE expression from 0 to 72 h after bicuculline treatment and,  
103 excitingly, observed an inverse correlation between LARGE and surface GluA1/2 expression  
104 (**Figure 1B**). These results strongly suggest an association between increased LARGE  
105 expression and decreased AMPA-R surface localization. To test this possibility, we altered  
106 LARGE expression using adeno-associated virus (AAV) expressing short hairpin (sh) RNA

107 and rescue constructs (**Figure 1C**) after validating the efficacy of shRNA-mediated *LARGE*  
108 KD (**Figure 1-figure supplement 1**). Notably, the bicuculline-induced decrease in surface  
109 GluA1 was mitigated by *LARGE* KD but reversed by *LARGE* rescue (**Figure. 1C**). However,  
110 neither *LARGE* KD nor *LARGE* rescue affected the TTX-induced increase in surface GluA1  
111 (**Figure 1-figure supplement 2B**).

112 Next, we monitored changes in synaptic AMPA-R in a single cell level by measuring the  
113 miniature excitatory postsynaptic current (mEPSC) at 48 h after bicuculline or TTX treatment  
114 with or without *LARGE* shRNA or rescue (**Figure 1D and Figure 1-figure supplement 2C**).  
115 Here, *LARGE* KD mitigated the bicuculline-induced decrease in synaptic AMPA-R according  
116 to changes in mEPSC amplitude, and *LARGE* rescue reversed this occlusion (**Figure 2D**).  
117 Again, neither *LARGE* KD nor *LARGE* rescue affected the TTX-induced increase in synaptic  
118 AMPA-R (**Figure 1-figure supplement 2C**). The fidelity of our mEPSC experiments was  
119 verified by monitoring cell batch-to-batch variation (**Figure 1-figure supplement 3**).

120 These data strongly suggest that *LARGE* is necessary for homeostatic scaling-down in  
121 hippocampal neurons.

122

### 123 ***LARGE* downregulates AMPA-R surface localization**

124 *LARGE* is required for AMPA-R surface and synaptic targeting during homeostatic scaling-  
125 down (**Figure 1**). The inverse correlation between *LARGE* and surface GluA1/2 expression  
126 (**Figure 1B**) suggests a link between increased *LARGE* expression and decreased AMPA-  
127 R surface localization, and recent studies have indicated that AMPA-R synaptic targeting is  
128 mainly regulated by the abundance of surface AMPA-R (**Granger et al., 2012; Hanley,**  
129 **2010**). Accordingly, we hypothesized that *LARGE* drives synaptic scaling-down by

130 downregulating AMPA-R surface targeting, and we first investigated whether LARGE could  
131 downregulate the cell-surface localization of AMPA-R (**Figure 2**).

132 Our surface biotinylation approach demonstrated significant increases and decreases in  
133 AMPA-R surface localization in response to *LARGE* KD and rescue, respectively, whereas  
134 KD or rescue affected total AMPA-R expression or NMDA-R surface localization (**Figure**  
135 **2A**). We additionally evaluated AMPA-R surface localization *ex vivo* using membrane-  
136 impermeable bis(sulfosuccinimidyl) suberate (BS<sup>3</sup>), which crosslinks proteins exposed on  
137 the cell surface (**Figure 2B**). The molecular weight of cross-linked surface GluA1 (>250 kDa)  
138 was higher than that of intracellular GluA1 (~105 kDa), consistent with our previous study  
139 (**Lee et al., 2012**). Although the surface and intracellular GluA1 levels respectively increased  
140 and decreased significantly in *Large*<sup>myd-/-</sup> mice relative to wild-type mice, NMDA-R surface  
141 localization was not affected by LARGE deficiency (**Figure 2B**), further confirming that  
142 LARGE specifically modulates AMPA-R. The increased AMPA-R surface localization  
143 following *LARGE* KD was originated in a single cell level (**Figure 2C**).

144 We further investigated whether LARGE could modulate AMPA-R surface localization in  
145 heterologous expression system. Here, in HEK293T cell culture, LARGE overexpression led  
146 to strong decreases in surface GluA1 and GluA2 localization but did not affect total AMPA-  
147 R expression (**Figure 2D**). The observed greater decrease in GluA1 relative to GluA2  
148 (**Figure 2D**) may explain the greater decrease in surface GluA1 vs. GluA2 during synaptic  
149 scaling-down (**Figure 1B**). Again, the effect of LARGE overexpression on AMPA-R surface  
150 localization was recapitulated in individual hippocampal neurons (**Figure 2E**).

151

152 **LARGE upregulates the Golgi localization of AMPA-R**

153 Next, we used confocal imaging to assess the subcellular localization of LARGE and thus  
154 understand the mechanism by which LARGE downregulates AMPA-R surface targeting.  
155 LARGE is known to localize at the Golgi in heterologous cells (**Brockington et al., 2005**)  
156 and to function at the Golgi in myocytes (**Kanagawa et al., 2004**). Similarly, in cultured  
157 hippocampal neurons, we observed a major pool of LARGE at the Golgi and Golgi outposts  
158 (**Figure 3A**). Accordingly, we hypothesized that LARGE downregulates AMPA-R trafficking  
159 from the Golgi to cell surface by increasing AMPA-R localization at the Golgi.

160 To test this concept, we first analyzed the co-localization of GluA1 with the Golgi marker  
161 GM130 in cultured hippocampal neurons after manipulating LARGE expression. Confocal  
162 imaging demonstrated that *LARGE* KD significantly decreased the pool of GluA1 at the Golgi,  
163 whereas *LARGE* rescue reversed this phenomenon (**Figure 3B**). Similarly, in HEK293T  
164 cells, LARGE overexpression significantly increased AMPA-R localization at the Golgi  
165 (**Figure 3-figure supplement 1A**).

166 Next, we biochemically analyzed the effects of LARGE co-expression on subcellular  
167 AMPA-R localization by fractionating subcellular organelles from HEK293T cells transfected  
168 with GluA1 without (-LRG) or with LARGE (+LRG) (**Figure 3C**). Without LARGE co-  
169 expression, the major GluA1 pool was detected in fractions enriched for P-cadherin, a  
170 plasma membrane marker. With LARGE co-expression, however, the major GluA1 pool  
171 shifted to high-density fractions enriched for GM130, a Golgi marker. Furthermore, the  
172 distributions of GluA1 and LARGE in the gradient almost completely overlapped when the  
173 proteins were co-expressed (**Figure 3C**), indicating a strong and direct association.  
174 Moreover, the relative AMPA-R pool size in the Golgi fractions decreased significantly in the  
175 brains of *LARGE* KO mice relative to wild-type mice, whereas the relative pool size in the  
176 plasma membrane fractions increased significantly (**Figure 3D and Figure 3-figure**



177 **supplement 1B**). These results suggest that LARGE plays an important role in maintaining  
178 AMPA-R pools at the Golgi.

179

### 180 **LARGE associates with AMPA-R through direct interaction**

181 HEK293T cells do not express synaptic proteins. Therefore, the co-sedimentation and co-  
182 localization of GluA1 with LARGE in these cells (**Figure 3C** and **Figure 3-figure**  
183 **supplement 1A**) suggested a direct interaction. To test this possibility, we performed  
184 reciprocal co-immunoprecipitation (co-IP) of LARGE and AMPA-R from HEK293T cells.  
185 Both co-IP strategies consistently showed that LARGE could specifically bind to AMPA-R in  
186 non-neuronal cells that do not express other known AMPA-R-binding proteins (**Figure 3E**).  
187 Interestingly, in a co-IP of LARGE with GluA2, LARGE bind only to the GluA2 correspond to  
188 intracellular GluA2 (**Hall et al., 1997**) (**Figure 3-figure supplement 2A**), suggesting that  
189 LARGE binds with AMPA-R within the cell, likely at the Golgi.

190 We further reconstituted the interaction of LARGE with AMPA-R *in vitro* using an enzyme-  
191 linked immunosorbent assay (ELISA) (**Figure 3F,G**). Given the molecular structures and  
192 topologies of LARGE and GluA1, we hypothesized that the C-terminal ectodomain of  
193 LARGE would bind the N-terminal ectodomain of GluA1. After confirming the purification of  
194 each protein (**Figure 3-figure supplement 2B-E**), we constructed an ELISA assay to verify  
195 the specific and direct interaction of LARGE with GluA1 (**Figure 3F**). Notably, GluA1 bound  
196 to LARGE with a higher affinity relative to that exhibited by GluA2 or GluA4 (**Figure 3G**).  
197 The interactions of LARGE with GluA1, 2, and 4 indicated that LARGE binding to AMPA-R  
198 is not subunit-specific. Similarly, the binding of the other AMPA-R interacting proteins, such  
199 as Stargazin (**Tomita et al., 2003**) and CKAMP44 is also not subunit-specific (**von**  
200 **Engelhardt et al., 2010**).

201 As GluA1 binds directly to the LARGE ectodomains (including catalytic domains), we  
202 evaluated whether the interaction of LARGE with AMPA-R could affect glycosylation of the  
203 latter. However, we observed no dramatic changes in LARGE-mediated GluA1 glycosylation  
204 (**Figure 3-figure supplement 3**), suggesting that the physical interaction of LARGE with  
205 GluA1, rather than LARGE glycosyltransferase activity, is the essential element with respect  
206 to AMPA-R. Similarly, a previous report found that the physical interaction of Notch with  
207 OFUT1, a glycosyltransferase, rather than OFUT1 enzymatic activity, was essential to the  
208 role of OFUT1 in Notch trafficking (**Okajima et al., 2005**). These results (**Figure 3**)  
209 consistently demonstrate the ability of LARGE to interact directly and specifically with  
210 AMPA-R to increase localization of the latter protein at the Golgi.

211

### 212 **The pool of LARGE-associated AMPA-R at the Golgi increases during homeostatic** 213 **scaling-down**

214 Next, we investigated whether LARGE-interacting AMPA-R at the Golgi might increase  
215 during homeostatic scaling-down. Confocal imaging of cultured hippocampal neurons  
216 revealed a significant increase in LARGE (**Figure 4A**) and accompanying increase in GluA1  
217 at the Golgi (**Figure 4B**) at 48 h after bicuculline treatment, which also led to an increase in  
218 GluA1 and LARGE co-localization around the perinuclear areas of neurons (**Figure 4C**).  
219 Together, these data strongly suggest that the co-localization of GluA1 and LARGE at the  
220 Golgi increases during synaptic scaling-down. Indeed, subcellular fractionation confirmed  
221 increases in both GluA1 and LARGE at the Golgi during scaling-down (**Figure 4D**). Finally,  
222 co-IP confirmed a significant increase in the association of LARGE with GluA1 during  
223 bicuculline-induced synaptic scaling-down (**Figure 4E**). Although the amount of GluA1  
224 immunoprecipitated by a GluA1 antibody decreased after bicuculline treatment, probably

225 because of increased protein (e.g., LARGE) binding and consequently reduced epitope  
226 exposure, the amount of LARGE that co-immunoprecipitated with GluA1 remained  
227 significantly elevated. Together, our results strongly support our working model, wherein  
228 increased LARGE expression (in response to increased neuronal activity) negatively  
229 regulates AMPA-R trafficking from the Golgi to the plasma membrane, thus downregulating  
230 AMPA-R synaptic targeting during synaptic scaling-down (**Figure 4F**).

231

### 232 **LARGE KD impairs hippocampal LTP due to synaptic AMPA-R overload**

233 Previous studies of LARGE have suggested a role for this protein in Hebbian synaptic  
234 plasticity (**Clarke et al., 2011; Holzfeind et al., 2002; Lisi and Cohn, 2007; Longman et**  
235 **al., 2003; Michele et al., 2002; Peyrard et al., 1999; Satz et al., 2010; Vaillend et al.,**  
236 **2008**), including LTP (**Satz et al., 2010**). The LTP deficit in *LARGE* KO mice could be due  
237 to abnormal brain development such as neuronal migration defect (**Holzfeind et al., 2002;**  
238 **Satz et al., 2010**). To determine whether the LARGE could affect Hebbian synaptic plasticity  
239 in normally developed adult mouse brain, we investigated hippocampal synaptic plasticity  
240 via *in vivo* LTP after KD of LARGE after the stereotaxic injection of an AAV expressing  
241 *LARGE* shRNA with GFP. Theta-patterned stimulation (TPS) protocol (**Cho et al., 2013**)  
242 readily induced long-lasting hippocampal CA1 LTP in control mice, but not in *LARGE* KD  
243 mice (**Figure 5A**). Despite this LTP impairment, *LARGE* KD exhibited dramatic increases in  
244 field excitatory postsynaptic potential (fEPSP) amplitudes (**Figure 5A**), leading us to analyze  
245 these amplitudes at different stimulation intensities. In an input-output analysis, the AMPA-  
246 R fEPSP amplitudes in *LARGE* KD mice increased significantly over input intensities of 30–  
247 100 mV (). However, *LARGE* KD did not affect presynaptic neurotransmitter release and  
248 short-term plasticity, which were evaluated using the paired-pulse ratio (PPR). The PPRs at

249 inter-pulse intervals of 200, 100, 75, 50, and 25 ms did not differ between control and *LARGE*  
250 KD mice (**Figure 5-figure supplementary 1B**), suggesting that the synaptic changes  
251 observed in the latter mice are not presynaptic events.

252 The above results strongly suggest that *LARGE* KD increases the synaptic current by  
253 increasing the number of AMPA-R molecules at the postsynapses. We therefore further  
254 examined whether *LARGE* could regulate the synaptic localization of AMPA-R. First, we  
255 analyzed AMPA-R-mediated mEPSC in cultured neurons transfected with scrambled  
256 shRNA, *LARGE* shRNA, or a *LARGE* rescue plasmid. *LARGE* KD significantly increased  
257 the amplitude, but not the frequency, of mEPSC relative to the controls. Moreover, *LARGE*  
258 rescue completely reversed the effect of KD on amplitude (**Figure 5B**). However, when we  
259 tested the effect of *LARGE* KD on inhibitory synapses, we observed no change in the  
260 miniature inhibitory postsynaptic current (mIPSC) in either *LARGE* KD or rescue cells  
261 (**Figure 5-figure supplementary 1C**), consistent with the findings of a previous  
262 study (Pribrag et al., 2014). These mEPSC and mIPSC analyses, therefore, demonstrate  
263 that changes in *LARGE* expression specifically affect the number of synaptic AMPA-R  
264 molecules at the excitatory postsynapses, without affecting presynapses or inhibitory  
265 synapses.

266 Second, we subjected cultured hippocampal neurons to confocal imaging to demonstrate  
267 that the number of GluA1 molecules within the dendritic spine increased significantly with  
268 *LARGE* KD relative to control neurons, and this increase was reversed by *LARGE* rescue  
269 (**Figure 5C**). Moreover, *LARGE* KD neurons had significantly larger spine heads but similar  
270 spine densities relative to control neurons; again, this was reversed by *LARGE* rescue  
271 (**Figure 5-figure supplementary 2**). Finally, our biochemical analysis demonstrated that  
272 GluA1 expression in the postsynaptic density (PSD) increased significantly in the

273 hippocampi of *LARGE* KO mice relative to controls (**Figure 5D**). Altogether, the impaired  
274 hippocampal LTP (**Figure 5A**) observed with *LARGE* KD is probably attributable to synaptic  
275 AMPA-R overload (**Figure 5B-D**), which inhibits the further capacity to increase the synaptic  
276 AMPA-R pool during LTP.

277

### 278 **LARGE deficiency impairs fear memory**

279 The effects of *LARGE* KD on Hebbian (LTP) and structural (spine size) synaptic plasticity  
280 (**Figure 5**), which underlie learning and memory in the brain, strongly suggested a role for  
281 *LARGE* in cognitive functions in the brain. To determine whether *LARGE* deficiency could  
282 cause learning and memory problems in animals, we subjected *LARGE* KO (*Large*<sup>myd<sup>-/-</sup></sup>),  
283 wild-type, and heterozygous mice (*Large*<sup>myd<sup>+/-</sup></sup> and <sup>+/-</sup>) to Pavlovian fear conditioning (**Figure**  
284 **6A**) and observed similar freezing behaviors in all three groups (**Figure 6B**). One day after  
285 fear conditioning, the mice were subjected to tests of contextual memory, an index of  
286 associative memory dependent on both hippocampal and amygdala function, and cued  
287 memory, a hippocampus-independent index of associative memory that still relies on proper  
288 amygdala function (**Sanders et al., 2003**). Compared with wild-type mice, KO mice  
289 displayed significant reductions in freezing behavior during both contextual and cued  
290 memory tests (**Figure 6C,D**), indicating that *LARGE* KO leads to deficits in both  
291 hippocampus- and amygdala-dependent memory.

292 We note, however, that KO mice are constitutive mutants. Therefore, the observed  
293 memory deficits may be attributable to abnormal brain development. Accordingly, we  
294 knocked down *LARGE* in the bilateral hippocampal CA1 regions of adult mice and rats via  
295 the stereotaxic injection of an AAV expressing *LARGE* shRNA with GFP prior to Pavlovian  
296 fear conditioning to examine the potential effects of *LARGE* on memory processes in the

297 absence of life-long inherent developmental abnormalities. Another group of mice injected  
298 with AAV expressing scrambled shRNA with GFP served as a control. We subsequently  
299 validated the efficacy of shRNA-mediated *LARGE* KD *in vivo* (**Figure 6-figure**  
300 **supplementary 1**) and confirmed the reliability of the experimental animals used in fear  
301 tests (**Figure 6-figure supplementary 2**). Although the two groups exhibited similar freezing  
302 behavior (**Figure 6E**), *LARGE* KD mice exhibited significantly less freezing behavior during  
303 contextual but not cued memory tests (**Figure 6F,G**). In rats, *LARGE* knockdown in the  
304 hippocampal CA1 produced the same effects on memory (**Figure 6H–J**).

305

### 306 **LARGE deficiency impairs hippocampus-dependent long-term memory**

307 We next subjected *LARGE* KD mice to various memory tests to identify the specific memory-  
308 associated role of *LARGE* in the brain. An initial open field test revealed no significant  
309 differences between KD and control groups (**Figure 7A**). In other words, *LARGE* KD mice  
310 exhibit normal locomotion and anxiety levels. To test spatial working memory, we used a Y-  
311 maze to evaluate whether KD mice could remember which arms of the maze had been  
312 recently visited. Again, no significant differences were observed between the groups (**Figure**  
313 **7B**).

314 Next, we used a simple novelty preference test that has used in previous studies of GluA1  
315 function for memory (**Freudenberg et al., 2016; Sanderson et al., 2009**), to measure both  
316 short- and long-term spatial memory in *LARGE* KD mice, using inter-trial intervals of 1 min  
317 and 24 h, respectively (i.e., hippocampus-dependent memory) (**Sanderson et al., 2009**).  
318 Although both groups exhibited a similar degree of preference for the novel arm at 1 min,  
319 the *LARGE* KD group failed to exhibit a preference for the novel arm at 24 h, compared with  
320 the control group (**Figure 7C**).

321 Finally, we performed the novel object recognition test, a popular testing paradigm for  
322 hippocampal function as a relay point of recognition memory (**Stilling et al., 2014**). During  
323 the training session, both groups displayed similar degrees of preference for two equal  
324 objects, with no inter-group difference in the short-term (5 min) preference for a novel object.  
325 Over the long term (24 h), however, the *LARGE* KD group failed to display a preference for  
326 the novel object relative to the control group (**Figure 7D**). Taken together, these findings  
327 suggest that hippocampal *LARGE* KD specifically impairs long-term, but not short-term,  
328 spatial and recognition memory.

329

## 330 **Discussion**

331 *LARGE* downregulates AMPA-R synaptic targeting by negatively controlling AMPA-R  
332 trafficking from the Golgi to the plasma membrane, and thus fine-tunes synaptic AMPA-R  
333 abundance (**Figure 4F**), a novel cellular mechanism underlying homeostatic scaling-down,  
334 which is a form of homeostatic plasticity. Moreover, the fine-tuning of AMPA-R trafficking by  
335 *LARGE* contributes to the two other types of synaptic plasticity, Hebbian (LTP) and structural  
336 (spine size) synaptic plasticity, that are the main underlying mechanisms of learning and  
337 memory. Indeed, hippocampus-dependent long-term memory formation was impaired in  
338 *LARGE* knockdown mice. *LARGE* mutations are associated with intellectual disabilities in  
339 humans (**Clarke et al., 2011; Longman et al., 2003; Vaillend et al., 2008**), and abnormal  
340 homeostatic synaptic scaling has been suggested as a pathophysiological component of  
341 brain disorders associated with maladaptive synaptic plasticity(**Turrigiano, 2008**). Our study  
342 thus provides novel insights into psychiatric and neurological disorders associated with  
343 intellectual disability.

344

345 **LARGE function for synaptic plasticity and memory stability.**

346 During homeostatic scaling-down, an increased LARGE expression at the Golgi apparatus  
347 negatively modulated AMPA-R trafficking from the Golgi to the plasma membrane, leading  
348 to the downregulation of surface and synaptic AMPA-R targeting. This novel mechanism for  
349 the regulation of AMPA-R trafficking via Golgi explains how global synaptic scaling-down at  
350 the single cell level is possible with all synapses regardless of their locations, connections,  
351 and histories.

352 Both Hebbian and homeostatic synaptic plasticity mainly adjust synaptic strength by  
353 altering the abundance of AMPA-R in the postsynaptic membrane. Although the common  
354 output suggests crosstalk between homeostatic and Hebbian synaptic plasticity (**Turrigiano,**  
355 **2008**), the mechanism of interaction within the same neuron remained unclear. The  
356 emerging idea that homeostatic synaptic plasticity acts as a form of metaplasticity to  
357 influence the subsequent induction of Hebbian plasticity (**Arendt et al., 2013; Soares et al.,**  
358 **2013**) is supported by our study. The lack of scaling-down and consequent increased GluA1  
359 synaptic targeting precluded the further synaptic addition of AMPA-R required for the  
360 induction of LTP. Moreover, our study strongly suggested that the crosstalk is required to  
361 stabilize encoded memories in the brain. A memory can be stabilized in the long-term  
362 through a consolidation process. LARGE KD mice exhibit deficits not in short-term memory  
363 but in long-term memory that needs consolidation (**Figure 7**). Without the LARGE-mediated  
364 scaling-down, synaptic AMPA-R levels increase chronically. The AMPA-R overload at the  
365 synapse is similar to an unconstrained LTP status (**Turrigiano, 2008**), wherein memory  
366 remains unstable because of a breakdown in synapse specificity. Together, our LARGE



367 functional study proposed a novel mechanism underlying the role of homeostatic synaptic  
368 plasticity for memory stability.

369

### 370 **Function of LARGE in the hippocampal consolidation of long-term memory**

371 The fear memory deficit observed in *LARGE* KO and KD animals indicates a role for LARGE  
372 in hippocampus-dependent memory (**Figure 6**). To determine a more specific function of  
373 LARGE, we subjected hippocampal CA1 *LARGE* KD mice to working, spatial, and  
374 recognition memory analyses. Working memory, which is necessary for the temporary  
375 storage and manipulation of information required for complex cognitive tasks, involves the  
376 hippocampal CA1 region (**Dillon et al., 2008**). The absence of *LARGE* KD-induced changes  
377 in working memory (**Figure 7B**) indicated that LARGE affects a particular type of memory.  
378 Next, we applied simple novelty preference and novel objective recognition tests to  
379 respectively examine spatial and recognition memory in *LARGE* KD mice. The former test  
380 identified an impairment in long- but not short-term spatial memory (**Figure 7C**). In simple  
381 novelty preference test, spatial long-term memory is formed through repetitive training over  
382 several days. This result thus suggests that LARGE plays a role in hippocampal memory  
383 consolidation. Similarly, the novel objective recognition test revealed impairment in long-  
384 rather than short-term object recognition in *LARGE* KD mice (**Figure 7D**). Working memory  
385 is hippocampus-dependent (**Dillon et al., 2008**) but does not require consolidation (**Guitar**  
386 **and Roberts, 2015**). Hence, the intact spatial working memory and short-term memory  
387 observed in this study strongly suggest that hippocampal *LARGE* KD specifically affects  
388 hippocampus-dependent, consolidation-requiring processes essential for memory stability.

389

### 390 **Effects of LARGE on Hebbian synaptic plasticity**

391 Hippocampal *LARGE* KD caused a failure of LTP (**Figure 5A**), which underlies long-term  
392 memory formation (including spatial memory consolidation) (**Lynch, 2004; Nabavi et al.,**  
393 **2014**). This LTP impairment was attributed to an overload of synaptic AMPA-R that blocked  
394 further AMPA-R synaptic targeting (**Figure 5B–D and Figure 5-figure supplementary 1A**).  
395 In consistent with our results, LTP occlusion due to elevation in postsynaptic AMPAR surface  
396 expression and function was reported previously (**Traunmuller et al., 2016**). The synaptic  
397 AMPA-R overload was due to chronic increase of neuronal activity (**Figure 4F**). Supportively,  
398 previous studies have shown that abnormally increased synaptic activity impairs LTP and  
399 memory. For example, enhanced synaptic responses suppress LTP development, resulting  
400 in hippocampal memory deficits(**Barnes et al., 1994**), whereas chronically increased  
401 fEPSPs cause persistent deficits in the acquisition of new spatial information (**Castro et al.,**  
402 **1989; McNaughton et al., 1986**). However, short-term plasticity remained intact in *LARGE*  
403 KD animals (**Figure 5-figure supplementary 1B**), consistent with the normal acquisition of  
404 fear training and short-term memory in both KO and KD animals (**Figure 6,7**). These results  
405 corroborate the theory that short- and long-term memories result from dissociable  
406 physiological processes (**Spear and Miller, 1981**) and are formed by different  
407 neurobiological mechanisms(**Barker et al., 2006**). The lack of change in short-term plasticity  
408 also supports our hypothesis that *LARGE* has a postsynaptic, rather than presynaptic, effect  
409 on synaptic plasticity, as demonstrated by the absence of effects of *LARGE* KD or  
410 overexpression on mEPSC frequency (**Figure 5B**).

411 Studies of *LARGE* function in the brain have focused on the association of *LARGE* with the  
412 dystrophin glycoprotein complex (DGC) (**Michele et al., 2002; Pribiag et al., 2014; Satz et**  
413 **al., 2010**). DGC components, including dystroglycan, are specifically expressed in inhibitory  
414 GABAergic synapses but not at excitatory glutamatergic synapses (**Levi et al., 2002;**

415 **Pribrig et al., 2014**). Accordingly, the effects of *LARGE* on Hebbian synaptic plasticity via  
416 the regulation of AMPA-R abundance at excitatory synapses provides novel insights into the  
417 intellectual disabilities associated with *LARGE* mutations in the brain.

418

419

## 420 **Materials and Methods**

421

### 422 Animal care and treatments

423 Experiments involving animals were performed in accordance with procedures approved by  
424 the Institutional Animal Care and Use Committee at the University of Texas Medical Branch  
425 (UTMB) and the Korea Advanced Institute of Science and Technology (KAIST). Care was  
426 taken to minimize the number of animals used and their discomfort. Colonies of *Large<sup>myd</sup>*  
427 mice originated from Jackson Laboratory and were transferred from Dr. Kevin Campbell's  
428 laboratory at the University of Iowa prior to establishment at UTMB. Male adult C57BL/6  
429 mice (wild type) were used in this study. The Sprague–Dawley rats and C57BL/6 mice used  
430 for behavior tests and neuronal cell culture were purchased from Harlan (USA) or Orient  
431 (Korea).

432

### 433 HEK293T cell culture

434 HEK293T cells were cultured at 37°C in high-glucose Dulbecco's Modified Eagle's Medium  
435 (Sigma) supplemented with 10% fetal bovine serum (Gibco) and antibiotics (Gibco). For  
436 transfection, cells were plated on coverslips in 12-well plates or 6-well plates and then  
437 transfected with various expression plasmids using the transfection reagent TransIT-X2  
438 (Mirus #mir6000).

439

### 440 Neuronal culture

441 Hippocampal neuronal cultures were prepared and maintained with glia-conditioned media  
442 as previously described (Kang et al., 2009). Briefly, timed pregnant female C57BL/6 mice  
443 and Sprague–Dawley rats were purchased, and primary cells were isolated from embryonic

444 day 17–18 (E17–18) pups. Mixed cell cultures containing both neurons and glia were then  
445 grown on coverslips in 12-well plates and in 6-well plates for use in biochemical experiments.  
446 The cultures were treated with 5  $\mu$ M cytosine  $\beta$ -D-arabinofuranoside (AraC, Sigma) at day  
447 in vitro (DIV) 3 to reduce the number of glial cells.

448

#### 449 Preparation of cDNA, shRNA, virus, transfection

450 The LARGE cDNA plasmid was kindly provided by Dr. Kevin Campbell (University of Iowa,  
451 Iowa City, IA, USA) and has been described previously (Kanagawa et al., 2004). The shRNA  
452 virus constructs were designed, generated, and screened as previously described (Kang et  
453 al., 2009). Briefly, four siRNAs were designed using [Custom SMARTpool Design](#) and  
454 synthesized (GE Dharmacon). The knockdown efficacy of each siRNA was tested, and the  
455 sequence of the selected siRNA (rat: CGGCUUUGCUGCCUUGAAA, mouse:  
456 UGGCUUUGCUGCCUUGAAA) was used to design an shRNA. The *LARGE* rescue  
457 construct was generated by replacing the sequence encoding GFP in the pAAV vector used  
458 for *LARGE* knockdown with a *LARGE* cDNA containing a shRNA-resistant sequence  
459 (CGGCUUUGCUGCCUUGAAA => CGGCUUUGCUGCCCUGAAA).

460 The AAV was packaged and purified as follows. The shRNA designed from the selected  
461 siRNA sequence was subcloned into the pAAV vector, and subsequently packaged into the  
462 virus by co-transfecting HEK293T cells with pHelper and pAAV-RC (serotype DJ/8). At 72 h  
463 post-transfection, the viral particles were harvested through two freeze/thaw cycles and  
464 sonication. Benzonase and Rnase I were added to the virus-released solution. To remove  
465 cell debris, the cell lysates were centrifuged at 2500  $\times$  g for 15 min, and the supernatants  
466 were filtered through 0.2- $\mu$ m syringe filters (Millipore, USA). A stock solution of 2.5 N NaCl  
467 and 40% PEG8000 (Sigma #5413) was added to the supernatant to yield final respective

468 concentrations of 0.5 N and 8%. The resulting solution was incubated on ice for 3 h and  
469 centrifuged at 2000 × g for 30 min, after which the supernatant was discarded. The pellets  
470 containing AAV were resuspended in HEPES buffer, and this crude AAV solution was  
471 treated with chloroform and PEG for an aqueous two-phase extraction (10% PEG8000–13.2%  
472 (NH<sub>4</sub>)<sub>2</sub>SO<sub>4</sub>) and final dialysis. The titer (>1 × 10<sup>11</sup> TU/ml) was measured by treating 10<sup>6</sup>  
473 neurons with the AAV and measuring enhanced green fluorescent protein (GFP) expression  
474 after 1 week (Figures S1A). The knockdown efficacy of AAV was evaluated using western  
475 blotting (Figures S1A).

476 Cell transfection procedures used the same shRNA constructs (pAAV) except for the rescue  
477 construct. For these experiments, the *LARGE* rescue construct was generated by adding a  
478 self-cleaving 2A peptide (P2A) site between the sequence encoding the *LARGE* cDNA  
479 containing the shRNA-resistant sequence and enhanced GFP within the *LARGE* shRNA-  
480 containing pAAV vector. The knockdown and rescue efficacies were evaluated using  
481 confocal imaging.

482

#### 483 Reverse transcription polymerase chain reaction (RT-PCR)

484 RNAs were extracted (MACHERY-NAGEL # MN740955.50) from the infected hippocampal  
485 CA1. cDNAs were synthesized from these RNAs using a kit according to the manufacturer's  
486 protocol (Invitrogen #11904-018). The genes (*LARGE*, *β-actin*) tested in this study were  
487 amplified from cDNA using DNA polymerase (enzymomics #P525) and gene-specific primers  
488 (in Key resource table).

489

#### 490 Stereotaxic injection of virus into animals

491 Adult (9–10 weeks of age) male C57BL/6 mice and Sprague–Dawley rats (body weight:  
492 275–300 g) were assigned to either a control or an experimental group and injected with  
493 AAV expressing either scrambled or *LARGE* shRNA, respectively, with enhanced GFP.  
494 Specifically, the animals were anesthetized with 2% avertin (Sigma) and placed into a  
495 stereotaxic apparatus (David Kopf instruments), after which the virus solution was injected  
496 into the bilateral CA1 region of the hippocampus using the following coordinates: mouse,  
497 anteroposterior, -1.95 mm from bregma; mediolateral,  $\pm 1.39$  mm; dorsoventral -1.66 mm;  
498 rat, anteroposterior, -2.4 mm from bregma; mediolateral,  $\pm 2.0$  mm; dorsoventral -2.0 mm.  
499 For mice, 0.5  $\mu$ l of virus solution was injected using a *picospritzer* with a glass pipette  
500 (diameter, 15–20  $\mu$ m). For rats, 2  $\mu$ l of virus solution was injected at a rate of 0.1  $\mu$ l/min  
501 using a syringe pump with a glass pipette (5- $\mu$ l syringe), and the needle was left in place for  
502 at least 10 min post-infusion. The animals were allowed to recover in a heated chamber  
503 before waking and were used for behavior tests at least 3 weeks after virus injection. After  
504 the tests, the targeting of virus injection into the hippocampal CA1 region was confirmed by  
505 the digital imaging of brain slices (2 mm thick) under a blue LED flashlight (DFP-1; NightSea)  
506 to excite the GFP. After detecting GFP fluorescence, the fluorescent region of the  
507 hippocampus was dissected for biochemical analyses.

508

#### 509 Fear conditioning and fear memory tests

510 Fear conditioning and fear memory tests were performed as previously described  
511 (Hernandez et al., 2010). The two-pair model of fear conditioning involves placing the animal  
512 in the fear conditioning apparatus (Med Associates) for a total of 7 min. Animals were left to  
513 explore freely for 3 min. At the 3-min and 5-min time points, an acoustic conditioned stimulus  
514 (white noise, 80 dB) was delivered for 30 s, and an unconditioned footshock stimulus was

515 administered through the grid floor during the last 2 s of tone presentation (0.5–0.6 mA for  
516 mice, 0.8 for rats) and co-terminated with the tone. Contextual fear memory was evaluated  
517 24 h after paired training by placing the animal into the same training context and measuring  
518 freezing behavior for 5 min. The cued fear memory was evaluated at least 4 h after the  
519 contextual test by placing the animal in a different context (novel cage floor, lighting, odor,  
520 and visual cues) with a 3-min free exploration period. At the 3-min mark, the same acoustic  
521 conditioned stimulus was delivered for 3 min, and freezing behavior was measured using  
522 Actimetrics FreezeFrame software with real-time digital video. Data are expressed as the  
523 percentage of freezing during each minute or as a mean across all minutes.

524

#### 525 Measurement of shock threshold

526 The shock thresholds for flinching, jumping, and vocalization, which are used as indices of  
527 sensitivity to a shock stimulus, were measured as previously described (Hernandez et al.,  
528 2010). Each animal was placed in the fear conditioning apparatus, and a sequence of single  
529 foot shocks was delivered. Initially, a 0.1-mA shock was delivered for 1 s; thereafter, the  
530 shock intensity was increased by 0.1 mA at 30-s intervals until an intensity of 1.0 mA was  
531 reached. The shock intensity was then decreased by 0.1 mA at 30-s intervals until an  
532 intensity of 0.1 mA was reached. Thresholds were then quantified by averaging the shock  
533 intensity at which each animal gave a flinching, jumping, and vocalization response.

534

#### 535 Open field test

536 In mice, locomotor activity and anxiety-related behavior were measured using the open field  
537 test. A mouse was placed in the corner of an open field box (40 cm × 40 cm × 40 cm; material,  
538 white acryl). To evaluate locomotor activity, the total distance traveled (cm) was measured



539 during each 5 min of the 30-min test. To evaluate anxiety, the time spent in the center of the  
540 box during the first 5 min (s) was analyzed (Ethovision XT 8.5, Nodulus). A photometer was  
541 used to adjust the light within a range of 5–10 lux.

542

#### 543 Y-maze

544 A Y-maze comprising of three symmetrical arms at 120° angles (30 cm length × 12 cm height  
545 × 7 cm width) was constructed from opaque acryl. A mouse was placed in the center of the  
546 maze and allowed to freely explore the three arms for 5 min. Timing began once the mouse  
547 left the center. Arm entry was defined as having all four limbs inside an arm. The sequence  
548 of entries was recorded to calculate spontaneous alternations.

549

#### 550 Simple novelty preference test

551 The simple novelty preference test was performed as described previously (Sanderson et  
552 al., 2009). The mice received five 2-min training trials involving exposure to two arms of a  
553 Y-maze (Start and Other arms; the third arm is blocked). Short and long-term memory were  
554 assessed by changing the interval between exposure training sessions. Timing was started  
555 once the mouse left the start arm. After exposure training, mice were subjected to a novelty  
556 preference test in which they were allowed to explore all three arms of the maze (Novel,  
557 Start, and Other arms) for 2 min. The exposure trials and novelty preference test were each  
558 separated by either 1 min (1-min inter-trial interval [ITI] condition) or 24 h (24-h ITI condition).  
559 The novel arm preference was calculated as the percentage ratio of the total amount of time  
560 spent exploring and number of entries into the Novel and Other arms (Novel/Novel + Other)  
561 x 100%.

562

563 Novel object recognition test

564 The novel object preference test was performed as described previously (Stilling et al., 2014).  
565 Mice were habituated to a white acryl box for 5 min on each of 2 consecutive days. Mice  
566 were then habituated to the same two objects placed in corners of the box for 5 min on each  
567 of the 2 consecutive days. The following day, the objects were exchanged for two new,  
568 identical objects (A + A), and the mice were allowed to explore the objects for 5 min. Next,  
569 the mice were placed in their home cages for 5 min (short-term memory task) and re-  
570 exposed to the arena in which one object had been exchanged (A + B). After 24 h, B was  
571 exchanged for C (long-term memory task). The durations of object contacts were measured.  
572 The novel object preference was reported as: (novel / sum (both objects)) x 100%.

573

574 In vivo field EPSP recordings

575 Three to 4 weeks prior to *in vivo* field recording, AAV expressing *LARGE* shRNA with GFP  
576 was infused into the hippocampal CA1 regions of adult C57BL/6 mice (8–9 weeks old) as  
577 described in Stereotaxic injection of virus into animals. The stereotaxic unilateral injection of  
578 0.5 µl of higher-titer AAV ( $1 \times 10^{11}$  TU/ml) was performed using a stereotaxic, motorized  
579 nano-injector (World Precision Instruments) at a rate of 0.1 µl/min via a Hamilton syringe  
580 connected to a microinjection pump.

581 The fEPSPs from the hippocampal CA1 region were recorded as previously described (Cho  
582 et al., 2013). C57BL/6 mice ( $n = 11-12$ ) were anesthetized with urethane (1.6 g/kg, i.p.;  
583 Sigma) and placed into a stereotaxic frame. Rectal temperature was maintained  
584 intraoperatively at  $36.5^{\circ}\text{C} \pm 0.5^{\circ}\text{C}$  using a temperature controller (Harvard Instruments).  
585 The scalp was opened and separated. Trepine holes were drilled into the skull, and  
586 electrodes were positioned in the area of the hippocampal stratum radiatum. A bipolar

587 stimulating electrode (2.0 mm posterior to bregma, 2.0 mm lateral to midline) was used for  
588 Schaffer collateral stimulation, and a monopolar recording electrode (1.9 mm posterior to  
589 bregma, 1.4 mm lateral to midline) was used to record from the CA1 region. The final depths  
590 of the electrodes were adjusted to optimize the magnitude of the evoked responses. The  
591 fEPSPs were adjusted to 50–60% of the maximal response size for testing. Stimulation was  
592 applied using an analog-to-digital interface (1322A; Molecular Devices) and a Digital  
593 Stimulus Isolation unit (Getting Instruments). The pyramidal neuron responses to Schaffer  
594 collateral stimulation were recorded using a differential amplifier (P55 A. C. pre-amplifier;  
595 Grass Instruments) and analyzed using WinLTP software (WinLTP Ltd.). Responses were  
596 evoked by single-pulse stimuli delivered at 20-s intervals. A stable baseline was recorded  
597 for 30 min. LTP was induced by applying theta-patterned stimulation (TPS, four trains  
598 comprising of 10 bursts of five pulses at 400 Hz with a 200-ms inter-burst interval and a 20-  
599 s inter-trial interval) to the CA1 and was optimized based on previous studies (Cho et al.,  
600 2013).

601

#### 602 Whole-cell patch-clamp recordings for mEPSCs and mIPSC analyses

603 Cultured hippocampal neurons were prepared as described above. Using a calcium  
604 phosphate transfection kit (Invitrogen #K278001), cultured hippocampal neurons were  
605 transfected at DIV 8 with cDNA plasmids expressing either scrambled shRNA with enhanced  
606 GFP, *LARGE* shRNA with GFP, or *LAEGE* shRNA with GFP and *LARGE* rescue. The  
607 cultured neurons were used for electrophysiological recordings at 3 days post-transfection.  
608 Miniature excitatory postsynaptic currents (mEPSCs) and miniature inhibitory postsynaptic  
609 currents (mIPSCs) were recorded at room temperature (21–23°C). Whole-cell voltage-clamp  
610 recordings were performed using a multiclamp 700B amplifier (Molecular Devices), filtered

611 at 1 KHz, and digitized at 10 KHz (Digidata 1550; Molecular Devices). Recording pipettes  
612 (4–6 M $\Omega$ ) were filled with the following intracellular solutions, as appropriate: for mEPSC  
613 analysis, 140 mM Cs-MeSO<sub>4</sub>, 8 mM NaCl, 10 mM HEPES, 0.5 mM EGTA, 1 mM MgCl<sub>2</sub>, 4  
614 mM Mg-ATP, 0.4 mM Na-GTP, 5 mM QX-314; for mIPSC analysis, 130 mM CsCl, 10 mM  
615 NaCl, 1.1 mM EGTA, 2 mM MgCl<sub>2</sub>, 0.1 mM CaCl<sub>2</sub>, 10 mM HEPES, 2 mM Mg-ATP. The pH  
616 was adjusted to 7.2 using CsOH, with 280–290 mOsm.

617 Hippocampal neurons on coverslips were transferred to a recording chamber that was  
618 continuously perfused with extracellular solution (pH 7.4, 310–320 mOsm) containing 150  
619 mM NaCl, 3.1 mM KCl, 2 mM CaCl<sub>2</sub>, 1 mM MgCl<sub>2</sub>, 10 mM HEPES, and 25 mM glucose. One  
620 micromolar tetrodotoxin (Tocris Bioscience #1078), 50  $\mu$ M DL-AP5 (Tocris Bioscience  
621 #3693), and 100  $\mu$ M picrotoxin (Sigma #P1675) were always included in the extracellular  
622 perfusing solution for mEPSC (for mIPSC, 20  $\mu$ M CNQX (Tocris Bioscience #0190) was  
623 used instead of picrotoxin). All recordings were voltage clamped at -70 mV. Acquired data  
624 were analyzed using pCLAMP 10.6 (Molecular Devices). Access resistance was  
625 continuously monitored. The data were discarded if the  $R_a$  varied by >20% during recording.  
626 Changes in frequency and amplitude were analyzed, quantified, and presented using traces,  
627 cumulative plots, and scatter plots. We confirmed that the frequency and amplitude did not  
628 vary among the batches used in experiments or between non-transfected and GFP-  
629 transfected neurons (Cont). For the homeostatic synaptic scaling experiment, neurons were  
630 pre-incubated in either 1  $\mu$ M TTX or 20  $\mu$ M bicucullin for 48 h before mEPSC recordings  
631 were obtained as described above.

632

### 633 Preparation of PSD

634 PSD was prepared as described previously (Kang et al., 2012), with some modifications.

635

636 Surface biotinylation

637 HEK293T cells in 10-cm plates or cultured neurons in 6-well plates were washed with  
638 phosphate-buffered saline (PBS) or artificial cerebrospinal fluid (ACSF; 0.15 M NaCl, 10 mM  
639 HEPES, 3 mM KCl, 0.2 mM CaCl<sub>2</sub> dihydrate, 10 mM glucose), respectively, and placed on  
640 ice. The cells were then incubated with 1–1.5 mg/ml sulfo-NHS-SS-biotin (Thermo #21331)  
641 for 20 min at 10°C. Subsequently, the biotin was quenched by incubation with 50 mM glycine  
642 for 10 min on ice, followed by washing. The cells were removed by scraping and solubilized  
643 in IP buffer containing 1.0% Triton X-100 and 0.1% SDS for 1 h at 4°C. After solubilization,  
644 the cells were centrifuged at 14,000 × g for 15 min, and the pellet was discarded. The  
645 supernatant containing biotinylated proteins was incubated with NeutrAvidin-Sepharose  
646 beads (Thermo #29200) for 3 h at 4°C. The beads were then thoroughly washed with IP  
647 buffer, and the proteins were eluted for 5 min at room temperature (RT) with protein gel-  
648 loading buffer. The total and cell-surface proteins were analyzed by SDS-PAGE, followed  
649 by western blot analysis.

650

651 Analysis of cell-surface proteins in hippocampal slices using the cross-linking reagent BS<sup>3</sup>

652 Cell-surface proteins were labeled using the membrane-impermeable cross-linking reagent  
653 bis(sulfosuccinimidyl) suberate (BS<sup>3</sup>, Thermo #21585) as described in previous studies (Lee  
654 et al., 2012), with some modifications. After the cardiac perfusion of mice with cold ACSF,  
655 the hippocampi were removed and placed into cold ACSF oxygenated with a 95% O<sub>2</sub>/5%  
656 CO<sub>2</sub> gas mixture. Each hippocampus was cut into five ~1-mm-thick slices and allowed to  
657 float in oxygenated ACSF. Ten slices from two hippocampi were incubated in BS<sup>3</sup> (Thermo-  
658 Pierce) solution (2.5 mM BS<sup>3</sup> dissolved in ACSF) for 40 min at 10°C with gentle shaking.

659 After quenching with ACSF containing 100 mM glycine three times for 5 min each, the slices  
660 were processed for solubilization, SDS-PAGE, and western blotting as described above for  
661 surface biotinylation.

662

### 663 Fractionation of subcellular organelles from cells or tissues

664 The iodixanol-based iso-osmotic density gradient-based subcellular organelle fractionation  
665 procedure was developed according to the instructions of the kit manufacturer (OptiPrep,  
666 Sigma #D1556), and optimized for two scales (5-ml volume gradient and 0.7-ml volume  
667 gradient). Briefly, cells or brain lysates were centrifuged for 10 min at  $3000 \times g$ , and the  
668 pellet was discarded. The supernatant was then centrifuged for 1 h at  $100,000 \times g$  to remove  
669 cytosolic contamination. The resulting second pellet was applied to the top of an OptiPrep  
670 discontinuous iodixanol gradient formed by the stepwise addition of solutions with increasing  
671 percentages of iodixanol (diluted in PBS). The 5.0-ml volume gradient was formed by adding  
672 0.385 ml of 2.5%, 0.77 ml of 5%, 0.77 ml of 7.5%, 0.77 ml of 10%, 0.192 ml of 12.5%, 0.77  
673 ml of 15%, 0.192 ml of 17.5%, 0.192 ml of 20%, and 0.192 ml of 30% iodixanol solutions to  
674 the bottom of a 5-ml Beckman centrifuge tube. The 0.7 ml volume gradient was formed by  
675 adding 27.5  $\mu$ l of 30%, 27.5  $\mu$ l of 20%, 27.5  $\mu$ l of 17.5%, 110  $\mu$ l of 15%, 27.5  $\mu$ l of 12.5%,  
676 110 $\mu$ l of 10%, 110  $\mu$ l of 7.5%, 110  $\mu$ l of 5%, and 55  $\mu$ l of 2.5% iodixanol solutions to the  
677 bottom of a 750- $\mu$ l Beckman centrifuge tube. After centrifugation for 2 h at 150,000g in a  
678 SW55i rotor and Beckman Optima centrifuge, 18–25 fractions were collected from the top  
679 of the column, depending on the experimental condition. Proteins in the fraction sets were  
680 resolved by SDS-PAGE, followed by western blot analyses with antibodies against the  
681 proteins of interest, including organelle markers, LARGE, and GluA1. The proteins were  
682 quantified by the densitometric analysis of bands in digital images of western blots and

683 subjected to statistical analyses. For each protein, the average density in each fraction was  
684 normalized to the peak density of the protein and plotted as a line graph. For organelle  
685 markers, each group was initially analyzed separately. However, as no significant changes  
686 were observed between wild-type and mutant *Large*<sup>myd</sup> mice, the data were subsequently  
687 merged into a single group.

688

#### 689 Immunoprecipitation

690 Small-scale immunoprecipitation was performed as described previously (Lee et al., 2012),  
691 with some modifications.

692

#### 693 Western blot analysis

694 Western blot analyses were performed as described previously (Kang et al., 2009). The  
695 rabbit anti-LARGE antibody (Rb331) (Kanagawa et al., 2004) was characterized previously.  
696 The mouse anti- $\beta$ -actin (Sigma #A5441) and mouse anti-tubulin antibodies (Sigma #T9026)  
697 were used at dilutions of 1:10000 and 1:20000, respectively. For organelle markers,  
698 antibodies against rabbit anti-GM130 (Abcam #AB52649), mouse anti-TGN38 (Thermo  
699 #MA3-063), and mouse anti-P-cadherin (Abcam #AB22744) were used at dilutions of  
700 1:10000. Mouse anti-GluA1 (Millipore #MAB2263), rabbit anti-GluA2/3 (Millipore #07-598),  
701 mouse anti-NR1 (Millipore #05-432), and rabbit anti-NMDAR2B antibodies (Abcam  
702 #ab65783) were used at dilutions of 1:1000. Quantitative analyses of band intensities were  
703 performed using Image Lab (Bio-Rad).

704

#### 705 Protein expression and purification of LARGE and Fc-fused GluA1Nt, 2Nt, and 4Nt for ELISA

706 The gene encoding the human LARGE catalytic domain (CD1–CD2) was cloned into a  
707 pET21a expression vector (Novagen) using the *NdeI* and *XhoI* restriction sites. The resulting  
708 vector was transformed into Origami B (DE3) host cells (Novagen) to facilitate the formation  
709 of disulfide bonds. Single colonies were seeded into LB media supplemented with ampicillin  
710 (100 µg/ml), kanamycin (50 µg/ml), and tetracycline (15 µg/ml). After an overnight incubation,  
711 10 ml of cultured cells were inoculated into 1,000 ml of fresh LB media. Once the cell density  
712 at 600 nm reached approximately 0.5, isopropyl-d-1-thiogalactopyranoside (IPTG) and  
713 MnCl<sub>2</sub> were added to final concentrations of 0.1 mM and 0.2 mM, respectively, to induce  
714 protein expression. The induced cells were further cultured at 18°C for 3 days. Following a  
715 cell harvest via centrifugation at 6,000 rpm, the cell pellet was resuspended in lysis buffer  
716 (20 mM Tris, 150 mM NaCl, 10 mM imidazole, pH 8.0) and subjected to disruption by  
717 sonication. The sonicated lysate was subjected to ultracentrifugation at 13,000 rpm and 4°C  
718 for 1 hour, and the supernatant was filtered through a 0.2-µm syringe filter (Millipore) and  
719 incubated with His-bind agarose resin (Elpis Biotech, Korea). After washing with a washing  
720 buffer (20 mM Tris, 150 mM NaCl, 20 mM imidazole, pH 8.0), LARGE proteins were eluted  
721 using an elution buffer containing 200 mM imidazole. Purified LARGE was subjected to a  
722 buffer change to a Tris-based buffer (20 mM Tris, 150 mM NaCl, pH 8.0) supplemented with  
723 0.2 mM MnCl<sub>2</sub>. This solution was stored at 4°C for further study.

724 Fc-GluA1Nt, 2Nt, and 4Nt were purified from HEK293T cells using a transient transfection  
725 protocol. Cells were cultured in 10 cm x 15 cm plates to 85–90% confluency and transfected  
726 with the target vectors (10 µg/plate). At 72 h post-transfection (Mirus), the cells were  
727 harvested via centrifugation at 6,000 rpm, and the cell pellet was resuspended in PBS and  
728 lysed by sonication. The lysate was then subjected to ultracentrifugation at 13,000 rpm and  
729 4°C for 1 hour, and the supernatant was filtered through a 0.2-µm syringe filter (Millipore)



730 and incubated with Protein A Sepharose beads (GE Healthcare #17-0780-01). After washing  
731 with a washing buffer (0.5% Triton X-100, 0.5 mM EDTA, 0.5 mM in PBS), the target proteins  
732 were eluted using an elution buffer containing 0.2 M glycine (pH 2.5). A proteinase inhibitor  
733 was added to all purification steps. Purified LARGE was then subjected to a buffer change  
734 using a Tris-based buffer (20 mM Tris, 150 mM NaCl, pH 8.0) and stored at 4°C.

735

### 736 Enzyme-linked immunosorbent assay (ELISA)

737 A 96-well plate (SPL, Korea) was coated with purified LARGE protein and bovine serum  
738 albumin (BSA) at 4°C. The following day, the antigen-coated plate was washed with PBS  
739 (pH 7.4) three times, and each well was incubated with a blocking buffer (PBS containing  
740 0.1% Tween-20 and 2% BSA; PBST-BSA) at room temperature for 1 hour. All buffers used  
741 in this study were supplemented with 2 mM MnCl<sub>2</sub>. After three washes with PBST, 10 µg/ml  
742 of Human-Fc fused GluA1 (GluA1-Fc) was added to the wells and incubated at room  
743 temperature for 1 hour. To detect GluA1 binding to the LARGE-coated surface, the plate  
744 was washed and incubated for 1 hour with goat anti-Human IgG (Fc specific)-Peroxidase  
745 (Sigma #A0170) diluted 1:3,000 in PBST-BSA. Binding signals were developed and stopped  
746 by the sequential addition of TMB (3,3',5,5'-tetramethylbenzidine) solution (Sigma #T0440)  
747 and 1 N sulfuric acid, and the colorimetric reaction was evaluated by measuring the  
748 absorbance at 450 nm. For a competition ELISA, GluA1-Fc was preincubated with 150 µg/ml  
749 of soluble LARGE, a competitor, for 30 min before its addition to the LARGE-coated plate.  
750 To identify binding preferences of LARGE toward the Fc-GluA1Nt, 2Nt and 4Nt subtypes,  
751 different concentrations of GluA1-family proteins were applied to the LARGE-coated plates  
752 as described above. The molarity of each subtype was calculated from the band intensity  
753 and molecular weight.

754

755 Immunocytochemistry, microscopy, and image analyses

756 These processes were performed as described previously (Kang et al., 2009), with some  
757 modifications.

758 For most immunocytochemistry experiments, cultured neurons were transfected at day in  
759 vitro (DIV) 13 and immunostained after 72 hours. For staining, cells were fixed with 4%  
760 paraformaldehyde/4% sucrose in PBS for 15 min and permeabilized in 0.2% Triton X-100  
761 for 10 min at room temperature. After blocking with 10% goat serum, the cells were  
762 incubated first with primary antibodies, followed by secondary antibodies. Cell surface  
763 proteins were immunostained with antibodies prior to permeabilization.

764 Immunostained cells were imaged using a confocal microscopy system comprising a Nikon  
765 A1 microscope with a 60x oil-immersion objective. The images were analyzed using NIS-  
766 Element Software (Nikon). Except for one rabbit anti-GluA1-Ct antibody (this paper: JH4294)  
767 and rabbit anti-LARGE antibody (this paper: UT1002), the following primary antibodies were  
768 used for staining were obtained commercially: mouse or chicken anti-GFP (Neuromabs #75-  
769 131 or Invitrogen #A10262), GluA1-Nt (Millipore), GM130 (BD Transduction Laboratories or  
770 Abcam), and chicken anti-MAP2 (Covance #PCK-554P). All secondary antibodies were  
771 purchased from Molecular Probes/Invitrogen/Life Technologies.

772 To quantify the confocal images presented in Figure 3C, the GluA1 intensity in the spine  
773 and integrated intensity of individual endogenous GluA1 puncta in the dendritic spine were  
774 measured. Images were analyzed using NIS-Elements AR (Nikon). To quantify the confocal  
775 images presented in Figure 5C and 5E, fluorescence signals in the soma and dendrites were  
776 quantified by measuring the area containing signals above a certain threshold. After  
777 normalization, the data were statistically analyzed and plotted as a histogram. To quantify

778 the confocal images presented in Figure 7A–7C, we focused on the number of overlapping  
779 Golgi & LARGE, Golgi & GluA1, or LARGE & GluA1 signals. These co-occurrences were  
780 independent of signal intensity. Accordingly, we applied the Manders overlap coefficient,  
781 which describes the degree of overlap, to the analysis of co-localization. The images were  
782 acquired at a thickness of 0.6  $\mu\text{m}$ . The threshold was determined using a global thresholding  
783 process to separate pixels from the background, and the coefficient was calculated from the  
784 pixels obtained from all slice images. Customized codes written using C++ and MATLAB  
785 were used.

786

### 787 Immunohistochemistry

788 Following sacrifice, mice were transcardially perfused with solution followed by 4%  
789 paraformaldehyde in PBS. The brains were quickly removed and post-fixed in the same  
790 solution overnight at 4°C. Coronal sections (50  $\mu\text{m}$  thick) were cut with a vibratome, washed  
791 in PB, permeabilized in PBT. with 0.1% Triton X-100 (Sigma), and blocked with 5% heat-  
792 inactivated horse serum (HS) for 1 h. The slices were then incubated with primary mouse  
793 anti-GFP (1:500; Neuromab) overnight at 4°C in PB with 5% HS. The slices were  
794 subsequently washed in PB and incubated for 2 h at room temperature with an Alexa Fluor  
795 488-conjugated goat anti-mouse antibody (1:1000; Invitrogen). After washing in PB, the  
796 slices were mounted using Vectashield with DAPI (Vector #H1200) and stored in the dark  
797 at 4°C. High-magnification images were taken using a confocal laser-scanning microscope  
798 (Nikon A1 system) equipped with lasers pretuned to 488 nm (i.e., FITC channel) and DAPI.  
799 The images were analyzed using NIS-Elements AR (Nikon).

800

### 801 Quantification and Statistical Analysis

802 All statistical analyses were performed using SigmaPlot software (Ver 12; SYSTAT  
803 Software). The statistical methods used for particular experiments are noted in the figure  
804 legends. Each biological experiment was replicated at least three times using different  
805 batches of cells or tissues from different animals. The number of required additional  
806 experiments was determined using a power analysis, which was based on a statistical  
807 analysis of the data from the first three experiments. The final data sets were analyzed using  
808 a two-tailed Student's t-test for experiments with two groups and/or a one (or two)-way  
809 ANOVA followed by a *post hoc* Tukey multiple comparison test for experiments with more  
810 than two groups. A probability (P) value  $\leq 0.05$  was considered significant. All data points  
811 were used in plots after confirming a normal distribution (data not shown). Most values are  
812 presented as mean values  $\pm$  standard errors of the means (SEM). Variations were calculated  
813 and are presented as SEMs.

814

815

816

## 817 **Acknowledgments**

818 This work was supported by the Institute for Basic Science (IBS, R001-D1) (H-S.S.) and the  
819 University of Texas Medical Branch (UTMB) (M-G.K.). We thank Drs. Kevin P. Campbell  
820 and Richard L. Huganir for the generous gifts of cDNA plasmids, antibodies, and *Large<sup>myd</sup>*  
821 mice. We thank all of the Kang Lab members for technical assistance and advice in this  
822 study.

823

## 824 **Competing Interests**

825 The authors declare no competing financial nor non-financial interests.

826

## 827 **Author Contributions**

828 M-G.K. designed and supervised the research. M-G.K. and B.A.S. wrote the paper. B.A.S.,  
829 T.C., D.Z.L., H.Y.L., J-J.L. B.L., S-W.K., and M-G.K., performed experiments and analyzed  
830 the data. K.A.C., K.T.D., T.A.G., H.M.K., S-Y.C., and H-S.S contributed reagents and  
831 analytical tools and provided input and expertise.

832

833

## 834 References

835 **Arendt, K.L.**, Sarti, F., and Chen, L. 2013. Chronic inactivation of a neural circuit enhances  
836 LTP by inducing silent synapse formation. *The Journal of Neuroscience* 33: 2087-2096. doi:  
837 [10.1523/JNEUROSCI.3880-12.2013](https://doi.org/10.1523/JNEUROSCI.3880-12.2013)  
838

839 **Barker, G.R.**, Warburton, E.C., Koder, T., Dolman, N.P., More, J.C., Aggleton, J.P., Bashir,  
840 Z.I., Auberson, Y.P., Jane, D.E., and Brown, M.W. 2006. The different effects on recognition  
841 memory of perirhinal kainate and NMDA glutamate receptor antagonism: implications for  
842 underlying plasticity mechanisms. *The Journal of Neuroscience* 26:3561-3566. doi:  
843 [10.1523/JNEUROSCI.3154-05.2006](https://doi.org/10.1523/JNEUROSCI.3154-05.2006)  
844  
845

846 **Barnes, C.A.**, Jung, M.W., McNaughton, B.L., Korol, D.L., Andreasson, K., and Worley, P.F.  
847 1994. LTP saturation and spatial learning disruption: effects of task variables and saturation  
848 levels. *The Journal of Neuroscience* 14:5793-5806.

849 **Brockington, M.**, Torelli, S., Prandini, P., Boito, C., Dolatshad, N.F., Longman, C., Brown,  
850 S.C., and Muntoni, F. 2005. Localization and functional analysis of the LARGE family of  
851 glycosyltransferases: significance for muscular dystrophy. *Human Molecular Genetics*  
852 14:657-665. doi: [10.1093/hmg/ddi062](https://doi.org/10.1093/hmg/ddi062)  
853

854 **Castro, C.A.**, Silbert, L.H., McNaughton, B.L., and Barnes, C.A. 1989. Recovery of spatial  
855 learning deficits after decay of electrically induced synaptic enhancement in the  
856 hippocampus. *Nature* 342:545-548. doi: [10.1038/342545a0](https://doi.org/10.1038/342545a0)  
857

858 **Cho, T.**, Ryu, J.K., Taghibiglou, C., Ge, Y., Chan, A.W., Liu, L., Lu, J., McLarnon, J.G., and  
859 Wang, Y.T. 2013. Long-term potentiation promotes proliferation/survival and neuronal  
860 differentiation of neural stem/progenitor cells. *PLoS One* 8:e76860. doi:  
861 [10.1371/journal.pone.0076860](https://doi.org/10.1371/journal.pone.0076860)  
862

863 **Clarke, N.F.**, Maugenre, S., Vandebrouck, A., Urtizberea, J.A., Willer, T., Peat, R.A., Gray,  
864 F., Bouchet, C., Many, H., Vuillaumier-Barrot, S., *et al.* 2011. Congenital muscular  
865 dystrophy type 1D (MDC1D) due to a large intragenic insertion/deletion, involving intron 10  
866 of the LARGE gene. *European Journal of Human Genetics* 19:452-457. doi:  
867 [10.1038/ejhg.2010.212](https://doi.org/10.1038/ejhg.2010.212)  
868

- 869 **Dillon, G.M.**, Qu, X., Marcus, J.N., and Dodart, J.C. 2008. Excitotoxic lesions restricted to  
870 the dorsal CA1 field of the hippocampus impair spatial memory and extinction learning in  
871 C57BL/6 mice. *Neurobiology Learning Memory* 90:426-433. doi: [10.1016/j.nlm.2008.05.008](https://doi.org/10.1016/j.nlm.2008.05.008)
- 872 **Freudenberg, F.**, Resnik, E., Kollker, A., Celikel, T., Sprengel, R., and Seeburg, P.H. 2016.  
873 Hippocampal GluA1 expression in Gria1-/- mice only partially restores spatial memory  
874 performance deficits. *Neurobiology Learning Memory* 135:83-90. doi:  
875 [10.1016/j.nlm.2016.07.005](https://doi.org/10.1016/j.nlm.2016.07.005)  
876
- 877 **Granger, A.J.**, Shi, Y., Lu, W., Cerpas, M., and Nicoll, R.A. 2012. LTP requires a reserve  
878 pool of glutamate receptors independent of subunit type. *Nature* 493:495-500. doi:  
879 [10.1038/nature11775](https://doi.org/10.1038/nature11775)
- 880 **Guitar, N.A.**, and Roberts, W.A. 2015. The interaction between working and reference  
881 spatial memories in rats on a radial maze. *Behavioural Processes* 112:100-107. doi:  
882 [10.1016/j.beproc.2014.10.007](https://doi.org/10.1016/j.beproc.2014.10.007)  
883
- 884 **Hall, R.A.**, Hansen, A., Andersen, P.H., and Soderling, T.R. 1997. Surface expression of  
885 the AMPA receptor subunits GluR1, GluR2, and GluR4 in stably transfected baby hamster  
886 kidney cells. *Journal of Neurochemistry* 68:625-630.
- 887 **Hanley, J.G.** 2010. Endosomal sorting of AMPA receptors in hippocampal neurons.  
888 *Biochemical Society Transactions* 38:460-465. doi: [10.1042/BST0380460](https://doi.org/10.1042/BST0380460)
- 889 **Hernandez, C.M.**, Kaye, R., Zheng, H., Sweatt, J.D., and Dineley, K.T. (2010). Loss of  
890 alpha7 nicotinic receptors enhances beta-amyloid oligomer accumulation, exacerbating  
891 early-stage cognitive decline and septohippocampal pathology in a mouse model of  
892 Alzheimer's disease. *The Journal of Neuroscience* 30:2442-2453. doi:  
893 [10.1523/JNEUROSCI.5038-09.2010](https://doi.org/10.1523/JNEUROSCI.5038-09.2010)
- 894 **Holzfeind, P.J.**, Grewal, P.K., Reitsamer, H.A., Kechvar, J., Lassmann, H., Hoeger, H.,  
895 Hewitt, J.E., and Bittner, R.E. 2002. Skeletal, cardiac and tongue muscle pathology,  
896 defective retinal transmission, and neuronal migration defects in the Large(myd) mouse  
897 defines a natural model for glycosylation-deficient muscle - eye - brain disorders. *Human*  
898 *Molecular Genetics* 11:2673-2687.
- 899 **Huganir, R.L.**, and Nicoll, R.A. 2013. AMPARs and synaptic plasticity: the last 25 years.  
900 *Neuron* 80:704-717. doi: [10.1016/j.neuron.2013.10.025](https://doi.org/10.1016/j.neuron.2013.10.025)
- 901 **Kanagawa, M.**, Saito, F., Kunz, S., Yoshida-Moriguchi, T., Barresi, R., Kobayashi, Y.M.,  
902 Muschler, J., Dumanski, J.P., Michele, D.E., Oldstone, M.B., et al. 2004. Molecular  
903 recognition by LARGE is essential for expression of functional dystroglycan. *Cell* 117:953-  
904 964. doi: [10.1016/j.cell.2004.06.003](https://doi.org/10.1016/j.cell.2004.06.003)

- 905 **Kang, M.G.**, Guo, Y., and Huganir, R.L. 2009. AMPA receptor and GEF-H1/Lfc complex  
906 regulates dendritic spine development through RhoA signaling cascade. *Proceedings of the*  
907 *National Academy of Sciences* 106:3549-3554. doi: [10.1073/pnas.0812861106](https://doi.org/10.1073/pnas.0812861106)
- 908 **Kang, M.G.**, Nuriya, M., Guo, Y., Martindale, K.D., Lee, D.Z., and Huganir, R.L. 2012.  
909 Proteomic Analysis of alpha-Amino-3-hydroxy-5-methyl-4-isoxazole Propionate Receptor  
910 Complexes. *The Journal Biological Chemistry* 287:28632-28645. doi:  
911 [10.1074/jbc.M111.336644](https://doi.org/10.1074/jbc.M111.336644)
- 912 **Lee, D.Z.**, Chung, J.M., Chung, K., and Kang, M.G. 2012. Reactive oxygen species (ROS)  
913 modulate AMPA receptor phosphorylation and cell-surface localization in concert with pain-  
914 related behavior. *Pain* 153:1905-1915. doi: [10.1016/j.pain.2012.06.001](https://doi.org/10.1016/j.pain.2012.06.001)
- 915 **Levi, S.**, Grady, R.M., Henry, M.D., Campbell, K.P., Sanes, J.R., and Craig, A.M. (2002).  
916 Dystroglycan is selectively associated with inhibitory GABAergic synapses but is  
917 dispensable for their differentiation. *The Journal of Neuroscience* 22:4274-4285. doi:  
918 [20026440](https://doi.org/10.1523/JNEUROSCI.2002-02.2002)
- 919 **Lisi, M.T.**, and Cohn, R.D. 2007. Congenital muscular dystrophies: new aspects of an  
920 expanding group of disorders. *Biochimica et Biophysica Acta* 1772:159-172. doi:  
921 [10.1016/j.bbadis.2006.09.006](https://doi.org/10.1016/j.bbadis.2006.09.006)
- 922 **Longman, C.**, Brockington, M., Torelli, S., Jimenez-Mallebrera, C., Kennedy, C., Khalil, N.,  
923 Feng, L., Saran, R.K., Voit, T., Merlini, L., *et al.* (2003). Mutations in the human LARGE gene  
924 cause MDC1D, a novel form of congenital muscular dystrophy with severe mental  
925 retardation and abnormal glycosylation of alpha-dystroglycan. *Human Molecular Genetics*  
926 12:2853-2861. doi: [10.1093/hmg/ddg307](https://doi.org/10.1093/hmg/ddg307)
- 927 **Lynch, M.A.** 2004. Long-term potentiation and memory. *Physiological Reviews* 84:87-136.  
928 doi: [10.1152/physrev.00014.2003](https://doi.org/10.1152/physrev.00014.2003)
- 929 **McNaughton, B.L.**, Barnes, C.A., Rao, G., Baldwin, J., and Rasmussen, M. 1986. Long-  
930 term enhancement of hippocampal synaptic transmission and the acquisition of spatial  
931 information. *The Journal of Neuroscience* 6:563-571.
- 932 **Michele, D.E.**, Barresi, R., Kanagawa, M., Saito, F., Cohn, R.D., Satz, J.S., Dollar, J.,  
933 Nishino, I., Kelley, R.I., Somer, H., *et al.* 2002. Post-translational disruption of dystroglycan-  
934 ligand interactions in congenital muscular dystrophies. *Nature* 418:417-422. doi:  
935 [10.1038/nature00837](https://doi.org/10.1038/nature00837)
- 936 **Nabavi, S.**, Fox, R., Proulx, C.D., Lin, J.Y., Tsien, R.Y., and Malinow, R. 2014. Engineering  
937 a memory with LTD and LTP. *Nature* 511:348-352. doi: [10.1038/nature13294](https://doi.org/10.1038/nature13294)



- 938 **Okajima, T.**, Xu, A., Lei, L., and Irvine, K.D. 2005. Chaperone activity of protein O-  
939 fucosyltransferase 1 promotes notch receptor folding. *Science* 307:1599-1603. doi:  
940 [10.1126/science.1108995](https://doi.org/10.1126/science.1108995)
- 941 **Peyrard, M.**, Seroussi, E., Sandberg-Nordqvist, A.C., Xie, Y.G., Han, F.Y., Fransson, I.,  
942 Collins, J., Dunham, I., Kost-Alimova, M., Imreh, S., *et al.* 1999. The human LARGE gene  
943 from 22q12.3-q13.1 is a new, distinct member of the glycosyltransferase gene family.  
944 *Proceedings of the National Academy of Sciences* 96:598-603.
- 945 **Pribiag, H.**, Peng, H., Shah, W.A., Stellwagen, D., and Carbonetto, S. (2014). Dystroglycan  
946 mediates homeostatic synaptic plasticity at GABAergic synapses. *Proceedings of the*  
947 *National Academy of Sciences* 111:6810-6815. doi: [10.1073/pnas.1321774111](https://doi.org/10.1073/pnas.1321774111)
- 948 **Sanders, M.J.**, Wiltgen, B.J., and Fanselow, M.S. 2003. The place of the hippocampus in  
949 fear conditioning. *European Journal Pharmacology* 463:217-223.
- 950 **Sanderson, D.J.**, Good, M.A., Skelton, K., Sprengel, R., Seeburg, P.H., Rawlins, J.N., and  
951 Bannerman, D.M. 2009. Enhanced long-term and impaired short-term spatial memory in  
952 GluA1 AMPA receptor subunit knockout mice: evidence for a dual-process memory model.  
953 *Learning & Memory* 16:379-386. doi: [10.1101/lm.1339109](https://doi.org/10.1101/lm.1339109)
- 954 **Satz, J.S.**, Ostendorf, A.P., Hou, S., Turner, A., Kusano, H., Lee, J.C., Turk, R., Nguyen, H.,  
955 Ross-Barta, S.E., Westra, S., *et al.* 2010. Distinct functions of glial and neuronal  
956 dystroglycan in the developing and adult mouse brain. *The Journal of Neuroscience*  
957 30:14560-14572. doi: [10.1523/JNEUROSCI.3247-10.2010](https://doi.org/10.1523/JNEUROSCI.3247-10.2010)
- 958 **Soares, C.**, Lee, K.F., Nassrallah, W., and Beique, J.C. (2013). Differential subcellular  
959 targeting of glutamate receptor subtypes during homeostatic synaptic plasticity. *The Journal*  
960 *of Neuroscience* 33:13547-13559. doi: [10.1523/JNEUROSCI.1873-13.2013](https://doi.org/10.1523/JNEUROSCI.1873-13.2013)
- 961 **Spear, N.E.**, and Miller, R.R. 1981. Information processing in animals, memory mechanisms  
962 (Hillsdale, N.J.: L. Erlbaum Associates).
- 963 **Stilling, R.M.**, Benito, E., Gertig, M., Barth, J., Capece, V., Burkhardt, S., Bonn, S., and  
964 Fischer, A. 2014. De-regulation of gene expression and alternative splicing affects distinct  
965 cellular pathways in the aging hippocampus. *Frontiers in Cellular Neuroscience* 8:373. doi:  
966 [10.3389/fncel.2014.00373](https://doi.org/10.3389/fncel.2014.00373)
- 967 **Tomita, S.**, Chen, L., Kawasaki, Y., Petralia, R.S., Wenthold, R.J., Nicoll, R.A., and Bredt,  
968 D.S. 2003. Functional studies and distribution define a family of transmembrane AMPA  
969 receptor regulatory proteins. *The Journal of Cell Biology* 161:805-816. doi:  
970 [10.1083/jcb.200212116](https://doi.org/10.1083/jcb.200212116)

- 971 **Traunmuller, L.**, Gomez, A.M., Nguyen, T.M., and Scheiffele, P. 2016. Control of neuronal  
972 synapse specification by a highly dedicated alternative splicing program. *Science* 352:982-  
973 986. doi: [10.1126/science.aaf2397](https://doi.org/10.1126/science.aaf2397)
- 974 **Turrigiano, G.G.** 2008. The self-tuning neuron: synaptic scaling of excitatory synapses. *Cell*  
975 135:422-435. doi: [10.1016/j.cell.2008.10.008](https://doi.org/10.1016/j.cell.2008.10.008)
- 976 **Vaillend, C.**, Poirier, R., and Laroche, S. 2008. Genes, plasticity and mental retardation.  
977 *Behavioural Brain Research* 192:88-105. doi: [10.1016/j.bbr.2008.01.009](https://doi.org/10.1016/j.bbr.2008.01.009)
- 978 **von Engelhardt, J.**, Mack, V., Sprengel, R., Kavenstock, N., Li, K.W., Stern-Bach, Y., Smit,  
979 A.B., Seeburg, P.H., and Monyer, H. 2010. CKAMP44: a brain-specific protein attenuating  
980 short-term synaptic plasticity in the dentate gyrus. *Science* 327:1518-1522. doi:  
981 [10.1126/science.1184178](https://doi.org/10.1126/science.1184178)  
982  
983  
984

## 985 **Figure Legends**

986

987 **Figure 1** LARGE is necessary for neuronal homeostatic scaling-down **(A)** Total LARGE  
988 expression increased significantly during synaptic scaling-down in response to a 2-day  
989 bicuculline treatment (Bicu), but was not significantly affected by 2-day tetrodotoxin (TTX)-  
990 induced synaptic scaling-up. Our surface biotinylation approach (schema) revealed  
991 increased and decreased surface GluA1 expression levels in response to treatment with  
992 TTX and Bicu, respectively, which confirmed the respective induction of scaling-up and -  
993 down (n = 4; two-tailed t-test, \**P* <0.01, \*\**P* <0.001). **(B)** During synaptic scaling-down,  
994 inverse correlations of LARGE expression were observed with surface GluA1 and GluA2  
995 expression (n = 6; one-way ANOVA, \**P* <0.05, \*\**P* <0.005). The decrease of surface GluA1  
996 was greater than that of GluA2 (n = 6; two-way RM ANOVA, #*P* <0.001). **(C)** High-density  
997 hippocampal cultures were infected with an AAV expressing scrambled shRNA with GFP  
998 (Cont), *LARGE* shRNA with GFP (shRNA) or *LARGE* rescue (Rescue). At DIV (Day of *in*  
999 *vitro*) 14, the neurons were subjected to surface biotinylation after a 2-day Bicu or TTX  
1000 treatment. The Bicu-induced decrease in surface GluA1 expression was blocked by the  
1001 knockdown (KD) of endogenous LARGE with *LARGE* shRNA (shRNA), but reversed by  
1002 *LARGE* rescue (Rescue) (n = 4; one-way ANOVA, \**P* <0.05, \*\**P* <0.005). **(D)** The Bicu-  
1003 induced decrease in mEPSC amplitude was blocked by the shRNA-mediated knockdown  
1004 (KD) of endogenous *LARGE*, but was reversed by *LARGE* rescue (Rescue) (1300, 1300,  
1005 1300, and 1262 events from n = 17, 16, 15, and 13 neurons, respectively; one-way ANOVA;  
1006 amplitude,  $F_{(3,57)} = 15.558$ , \**P* <0.005, \*\**P* <0.001; frequency;  $F_{(3,57)} = 0.619$ , *P* = 0.606).  
1007 Representative images show GFP-positive and negative neurons in a whole-cell patch  
1008 clamp experiment. Cultured hippocampal neurons transfected on DIV (Day of *in vitro*) 8 with  
1009 cDNA plasmids expressing either scrambled shRNA with GFP, *LARGE* shRNA with GFP,

1010 or *LARGE* shRNA with GFP and *LARGE* rescue with GFP, were subjected to a whole-cell  
1011 patch clamp experiment after a 2-day treatment with Bicuculline or Tetrodotoxin. A calcium phosphate  
1012 method was used to yield a transfection efficiency of approximately 20%. Scale bar = 10  $\mu$ m.

1013

1014 **Figure 2** *LARGE* downregulates the surface localization of AMPA-R. **(A)** *LARGE*  
1015 knockdown (KD) increased cell-surface GluA1 (Surface) expression, which was reversed by  
1016 *LARGE* rescue. However, changes in *LARGE* expression did not affect the total GluA1  
1017 (Input) or GluN1 expression (n = 3; one-way ANOVA, \**P* < 0.001, \*\**P* < 0.005, \*\*\**P* < 0.05).  
1018 **(B)** A schema of the *ex vivo* cross-linking of surface proteins using BS<sup>3</sup>. Cross-linked and  
1019 non-cross-linked proteins are indicated by high-molecular-weight (Surface) and low-  
1020 molecular-weight bands (Internal), respectively. Surface GluA1 levels increased and internal  
1021 GluA1 levels decreased in homozygous (-/-) mice (*Large<sup>myd</sup>*) *ex vivo*, compared with wild-  
1022 type (+/+) and heterozygous (+/-) mice. GluN2B was used as an internal control (n = 3; two-  
1023 tailed t-test, \**P* < 0.001, \*\**P* < 0.05). **(C)** An imaging analysis of cultured neurons revealed  
1024 higher levels of surface-localized GluA1 (sGluA1) in neurons expressing *LARGE* shRNA  
1025 (GFP-positive neurons) than in neighboring GFP-negative neurons (Cont). The GluA1  
1026 antibody was applied before neuron permeabilization. MAP2, a marker of neuronal dendrites,  
1027 was used to determine the number and morphology of neurons (n = 20, 20 neurons; Mann-  
1028 Whitney rank-sum test, T = 234, U = 24, \**P* < 0.001). Scale bars = 10  $\mu$ m. **(D)** Co-expression  
1029 of *LARGE*-GFP (*LARGE* or LRG) with myc-GluA1 (GluA1) and myc-GluA2 (GluA2) in  
1030 HEK293T cells significantly reduced the respective cell-surface localization of GluA1  
1031 (sGluA1) and GluA2 (sGluA2). However, total GluA1 (tGluA1) and GluA2 (tGluA2) levels in  
1032 the Input were not significantly altered (n = 8; two-tailed t-test, \**P* < 0.001). **(E)** Co-expression

1033 of LARGE with GFP-GluA1 significantly reduced cell-surface GluA1 (sGluA1) levels at  
1034 cultured neurons. A schema of our imaging assay. sGluA1 was labeled with a red  
1035 fluorophore-conjugated anti-GluA1 antibody prior to neuron permeabilization. After  
1036 permeabilization, total GluA1 (tGluA1) was stained using a green fluorophore-conjugated  
1037 anti-GFP antibody (n = 10, 10 neurons; Mann–Whitney rank-sum test, T = 147, U = 8, \*P  
1038 <0.005). Scale bar = 10  $\mu$ m.

1039

1040 **Figure 3** LARGE directly interacted with AMPA-R to increase AMPA-R localization at the  
1041 Golgi. (A) Confocal images demonstrating major pools of GFP-tagged LARGE (LARGE-  
1042 GFP) in the cis-Golgi (Top), trans-Golgi (middle), and Golgi outposts (bottom) of cultured  
1043 hippocampal neurons. GM130 and TGN38 are cis-Golgi and trans-Golgi marker proteins,  
1044 respectively. Scale bar = 10  $\mu$ m. (B) LARGE knockdown (KD; shRNA) decreased the  
1045 number of GluA1 molecules at the Golgi, compared with non-transfected and scrambled-  
1046 shRNA transfected neurons (Cont). This phenomenon was reversed by LARGE rescue  
1047 (Rescue) (n = 12, 11, 12, 13 neurons;  $F_{(2,33)} = 31.618$ , \*P <0.001, \*\*P <0.002). Scale bar =  
1048 30  $\mu$ m. (C) The density gradient-based subcellular fractionation of HEK293T cells revealed  
1049 that the co-expression of LARGE with GluA1 (+LRG) significantly altered the distribution of  
1050 AMPA-R pools in the Golgi and plasma membrane. In the +LRG group, the relative size of  
1051 the GluA1 pool at the Golgi (GM130) increased significantly whereas that in the plasma  
1052 membrane (P-Cadherin) decreased significantly relative to the control group (-LRG, GluA1  
1053 only) (n = 3; two-tailed t-test, \*P <0.05). (D) Subcellular fractionation of hippocampal tissues  
1054 from Large knockout mice (Large<sup>myd<sup>-/-</sup></sup>) revealed relative decreases and increases,  
1055 respectively, in the relative sizes of the GluA1 pools in the Golgi and plasma membrane,  
1056 compared with those in wild-type mice (WT) (n = 3, 3 mice; two-tailed t-test, \*P <0.05, \*\*P

1057 <0.001). (E) Heterologous HEK293T cells in which LARGE-GFP had been co-expressed  
1058 with myc-tagged GluA1 (myc-GluA1) were subjected to immunoprecipitation (IP). IP of  
1059 LARGE with an anti-GFP antibody specifically co-immunoprecipitated GluA1 (left), and IP  
1060 of GluA1 with an anti-myc antibody specifically co-immunoprecipitated LARGE (right). (F)  
1061 The direct interaction between LARGE and AMPA-R was examined using an enzyme-linked  
1062 immunosorbent assay (ELISA). The LARGE ectodomain (Catalytic domain 1 [CD1] + CD2)  
1063 used to coat the bottom of the plate bound directly to the Fc-fused N-terminal ectodomain  
1064 of GluA1 (GluA1-Fc). Binding was quantified by measuring the activity of FC antibody-  
1065 coupled peroxidase ( $n = 3$ ;  $F_{(5,12)} = 293.046$ ,  $*P < 0.001$ ,  $**P < 0.01$ ). (G) Another ELISA used  
1066 to evaluate the relative binding affinities of LARGE for each AMPA-R subunit yielded the  
1067 following order from highest to lowest: GluA1 > GluA2 > GluA4 ( $n = 3$ ;  $F_{(2,12)} = 867.644$ ,  $*P$   
1068 <0.001 compared with GluA2 and GluA4). (B, F) One-way ANOVA, (G) two-way RM ANOVA.  
1069

1070 **Figure 4** The LARGE-associated pool of AMPA-R at the Golgi increases during homeostatic  
1071 scaling-down. (A-C) A series of confocal microscopy images of cultured hippocampal  
1072 neurons double-stained for a Golgi marker (GM130) and LARGE or GluA1 yielded several  
1073 findings. (A) LARGE localization at the Golgi increased significantly after a 48-h bicuculline  
1074 treatment (Bicu 48h) ( $n = 9$ , 10 neurons; two-tailed t-test,  $t_{17} = -3.937$ ,  $*P < 0.001$ ). Scale bar  
1075 = 10  $\mu\text{m}$ . (B) GluA1 localization at the Golgi increased significantly in response to Bicu 48h  
1076 ( $n = 12$ , 13 neurons; Mann-Whitney rank-sum test,  $T = 90$ ,  $U = 12$ ,  $*P < 0.001$ ). (C) The co-  
1077 localization of GluA1 and LARGE in the perinuclear region increased significantly in  
1078 response to Bicu 48h ( $n = 9$ , 10 neurons; two-tailed t-test,  $t_{17} = -4.728$ ,  $*P < 0.001$ ). (D)  
1079 Density gradient fractionation of subcellular organelles revealed significant increases in the  
1080 relative amounts of GluA1 and LARGE in the Golgi fraction following treatment with Bicu

1081 48h ( $n = 4$ ; two-tailed t-test,  $*P < 0.05$ ,  $**P < 0.005$ ). (E) Bicu 48h significantly increased the  
1082 binding of LARGE to GluA1, as demonstrated by the increased co-immunoprecipitation of  
1083 LARGE and GluA1 ( $n = 3$ ; two-tailed t-test,  $*P < 0.01$ ). (F) Schema of our working model for  
1084 the regulation of AMPA-R trafficking by LARGE during homeostatic scaling-down.

1085

1086 **Figure 5** LARGE knockdown (KD) causes synaptic AMPA-R overload and thus impairs long-  
1087 term potentiation (LTP) in the hippocampal CA1 region. (A) A schema, plot, and traces from  
1088 an *in vivo* LTP analysis after an injection of virus encoding LARGE shRNA. LARGE KD (LRG  
1089 shRNA) was found to impair LTP ( $n = 8$ , 8 mice; two-tailed t-test,  $*P < 0.05$ ). Scale bar = 300  
1090  $\mu\text{m}$ . (B) Whole-cell patch clamping yielded current traces, cumulative plots, and scattered  
1091 plots from an mEPSC analysis following transfection with plasmids encoding scrambled  
1092 shRNA (Cont), LARGE shRNA, or LARGE rescue. LARGE KD increased the amplitude but  
1093 not the frequency of mEPSC, whereas LARGE rescue reversed this amplitude change.  
1094 Three different groups from 48 coverslips in four batches of neuronal culture were recorded  
1095 ( $n = 1653$ , 1660, and 1622 events from  $n = 17$ , 17, and 17 neurons, respectively; Amplitude,  
1096  $F_{(2,48)} = 17.815$ ,  $*P < 0.001$ ,  $**P = 0.026$ ; Frequency,  $F_{(2,48)} = 0.452$ ,  $P = 0.639$ ; Cont: black,  
1097 shRNA: red, Rescue: cyan). (C) LARGE KD (shRNA) increased the number of GluA1  
1098 molecules in the dendritic spines, whereas this phenomenon was reversed by LARGE  
1099 rescue ( $n = 529$ , 529, and 562 spines from  $n = 13$ , 14, and 14 neurons, respectively;  $F_{(2,38)}$   
1100  $= 25.026$ ,  $*P < 0.001$ ,  $**P < 0.005$ ). Scale bars = 30  $\mu\text{m}$  (whole cell image) and 10  $\mu\text{m}$   
1101 (dendrite). (D) Schema, blot, and bar graph of a western blot analysis of GluA1 expression  
1102 in the postsynaptic density (PSD) of hippocampi from LARGE knockout (KO) mice (-/-),  
1103 demonstrating increased synaptic AMPA-R expression relative to that observed in WT mice  
1104 (+/+) *in vivo* ( $n = 3$ , 3 mice; two-tailed t-test,  $*P < 0.005$ ). (b, c) one-way ANOVA.

1105

1106 **Figure 6** LARGE deficiency impairs fear memory. **(A)** Schema of a fear memory test. **(B)**  
1107 *LARGE* knockout (KO) did not induce differences in fear conditioning ( $n = 7, 7, 7$  mice) **(C,**  
1108 **D)** Contextual and cued fear memory deficits were observed in KO mice (-/-). ( $n = 7, 7, 7$   
1109 mice; contextual,  $F_{(2,18)} = 6.808$ ,  $*P < 0.01$ ; cued,  $F_{(2,18)} = 12.148$ ,  $**P < 0.001$ ). **(E)** No  
1110 differences in fear conditioning were observed in *LARGE* knockdown (KD) mice ( $n = 19, 19$   
1111 mice). **(F)** Contextual memory deficits were observed in *LARGE* KD mice ( $n = 19, 19$  mice,  
1112 two-tailed t-test,  $t_{36} = 3.684$ ,  $*P < 0.01$ ). **(G)** No differences were observed in cued memory  
1113 ( $n = 19, 19$  mice, Mann–Whitney rank-sum test,  $T = 390$ ,  $U = 161$ ,  $P = 0.579$ ). **(H)** No  
1114 differences in fear conditioning were observed in *LARGE* KD rats ( $n = 9, 10$  mice). **(I)**  
1115 Contextual memory deficits were observed in *LARGE* KD rats ( $n = 9, 10$  rats, two-tailed t-  
1116 test,  $t_{17} = 5.709$ ,  $*P < 0.005$ ). **(J)** No differences were observed in cued memory ( $n = 9, 10$   
1117 mice, two-tailed t-test,  $t_{17} = -0.0162$ ,  $P = 0.987$ ). **(E–J)** Animals were injected with a virus  
1118 expressing either scrambled (Cont) or *LARGE* shRNA with GFP (shRNA). **(B, E, H)** Two-  
1119 way RM ANOVA, **(C, D)** One-way ANOVA.

1120

1121 **Figure 7** LARGE deficiency impairs hippocampus-dependent long-term but not short-term  
1122 memory. **(A)** In the open field test, no differences were observed in the distances moved  
1123 and time spent in the center ( $n = 16, 16$  mice; center time, two-tailed t-test,  $t_{30} = 1.393$ ,  $P =$   
1124  $0.174$ ). **(B)** In the Y-maze-based working memory test, no differences were observed in  
1125 spontaneous alternations or the total number of entries ( $n = 16, 16$  mice, two-tailed t-test,  $t_{30}$   
1126  $= 0.581$ ,  $P = 0.566$ ). **(C)** In the simple novelty preference test, *LARGE* knockdown (KD) mice  
1127 exhibited a preference in the short term (1 min;  $n = 12, 12$  mice, Mann–Whitney rank-sum  
1128 test; entries,  $T = 168$ ,  $U = 54$ ,  $P = 0.308$ ; time,  $T = 141$ ,  $U = 57$ ,  $P = 0.601$ ), but not in the



1129 long term (24 h; n = 12, 12 mice, two-tailed t-test; entries,  $t_{22} = 2.727$ ,  $*P = 0.012$ ; time,  $t_{22} =$   
1130  $2.483$ ,  $**P = 0.021$ ). ITI: inter-trial intervals. The novel arm preference was calculated as  
1131  $(\text{novel}/\text{novel} + \text{other}) \times 100\%$ . **(D)** In the novel object recognition test, control and *LARGE*  
1132 KD mice similarly explored two identical objects during training (n = 19, 20 mice, two-tailed  
1133 t-test,  $t_{37} = 0.556$ ,  $P = 0.582$ ). Both groups exhibited similar preferences during a short-term  
1134 memory test (5 min; n = 19, 20 mice, Mann–Whitney rank-sum test,  $T = 393$ ,  $U = 177$ ,  $P =$   
1135  $0.725$ ). In a long-term memory test, *LARGE* KD mice exhibited no preference for the novel  
1136 object (24 h; n = 19, 20 mice, two-tailed t-test,  $t_{37} = 3.773$ ,  $*P < 0.001$ ). The novel object  
1137 preference was calculated as  $(\text{novel}/\text{novel} + \text{familiar}) \times 100\%$ . **(A)** Two-way RM ANOVA for  
1138 distance moved.

1139

1140 **Figure 1-figure supplementary 1.** Validation of AAV expressing *LARGE* shRNA  
1141 with GFP. **(A)** A representative fluorescence image of GFP signals demonstrated  
1142 that most cultured hippocampal neurons were infected by the AAV. **(B)** Differential  
1143 interference contrast (DIC) image shows the number and shape of neurons in the  
1144 culture. These live images were recorded with 20x objective attached to a Nikon  
1145 TMD inverted microscope system connected to a Nikon digital camera system  
1146 (Digital-Sight DS-2Mv). **(C)** Western blot analysis confirmed knockdown of *LARGE*.  
1147 Scrambled shRNA was used as control (Cont) (n=3, two tailed t-test,  $*P < 0.005$ ).  
1148 Scale bar = 100  $\mu\text{m}$ .

1149

1150 **Figure 1-figure supplementary 2.** *LARGE* is necessary for neuronal homeostatic  
1151 scaling-down but not for scaling-up. **(A)** Confocal images of cultured hippocampal

1152 neurons confirmed the increase in LARGE expression in response to Bicuculline but not  
1153 TTX (n = 13, 13, 13 neurons; Mann–Whitney rank sum test, T = 91, U = 0, \*P <0.001;  
1154 Blue: DAPI, red: endogenous LARGE). Scale bar = 10  $\mu$ m. **(B)** The TTX-induced  
1155 increase in surface GluA1 was not affected by LARGE shRNA or LARGE rescue. (n  
1156 = 3; one-way ANOVA, \*P <0.001, \*\*P = 0.027). **(C)** The TTX-induced increase in  
1157 mEPSC amplitude was not affected by LARGE KD or rescue (1300, 1270, 1300, and  
1158 1279 events from n = 17, 13, 14, and 13 neurons, respectively; one-way ANOVA;  
1159 amplitude, F(3,53) =7.783, \*P <0.001; frequency; F(3,53) =1.211, P = 0.315). The  
1160 mEPSC traces and cumulative and scattered plots are shown. Nine different groups  
1161 were recorded using 60 coverslips from three batches of neuronal culture.

1162

1163 **Figure 1-figure supplementary 3.** Verification of low-level batch-to-batch variation  
1164 in our mEPSC experiments. **(A)** The amplitude and frequency did not vary among  
1165 the batches used in experiments **(B)** The amplitude and frequency did not vary  
1166 between non-transfected and GFP-transfected neurons

1167

1168 **Figure 3-figure supplementary 1.** LARGE increased AMPA-R pool in the Golgi. **(A)**  
1169 GFP-GluA1 in Golgi was increased by LARGE overexpression (GluA1 + LRG),  
1170 compared with a control (GluA1) (n = 30, 30 cells; Two tailed t-test, \*P < 0.001). Co-  
1171 localization of GluA1 with GM130 in HEK293T cells analyzed by 3D reconstruction  
1172 of a series of z-stack confocal images. Complete (yellow) and partial co-localization  
1173 (orange). Co-localization of GluA1 and LARGE was quantified using the co-

1174 localization analysis tool in the NIS-Elements software (Nikon). In the analysis,  
1175 Manders overlap coefficients were given and used to obtain the relative co-  
1176 localization values between those two proteins. Scale bar = 10  $\mu$ m. **(B)** Fractionation  
1177 of subcellular organelles from the hippocampal CA1 of mice. Representative data  
1178 showing the fractionation of organelle markers and LARGE. P-cadherin, plasma  
1179 membrane marker; GM130, Golgi markers.

1180

1181 **Figure 3–figure supplementary 2.** LARGE directly interacts with AMPA-R subunits.

1182 **(A)** LARGE interacted with GluA2 inside of cell (lower band) but not with GluA2 at  
1183 the plasma membrane (upper band). Analysis of LARGE association with AMPA-R  
1184 determined by immunoprecipitation (IP). HEK293T cells were transfected with myc-  
1185 GluA1, myc-GluA2, and/or LARGE-GFP. IP with anti-GFP antibody. Both GluA1 and  
1186 GluA2 were co-immunoprecipitated with LARGE-GFP. As see in Input, GluA2 yield  
1187 two bands (upper and lower bands). Most GluA2 co-immunoprecipitated with  
1188 LARGE was GluA2 correspond to intracellular GluA2, judging from its molecular  
1189 weight. **(B-E)** Purification of GluA1 and LARGE (catalytic domain 1 [CD1] + CD2)  
1190 proteins. SDS-PAGE **(B)** and Western-blot **(C)** analysis of purified GluA1Nt-Fc fusion  
1191 protein. SDS-PAGE **(D)** and Western-blot **(E)** analysis of purified LARGE.

1192

1193 **Figure 3–figure supplementary 3.** LARGE interaction with AMPA-R did not change  
1194 glycosylation of AMPA-R. No change in N- and O-glycosylation of GluA1 with co-  
1195 expression of LARGE in HEK293T cells. N-linked glycosylation of GluA1 was

1196 analyzed using two de-glycosylation enzymes, endoglycosidase F (Endo-F) and  
1197 endoglycosidase H (Endo-H). Endo-F completely de-glycosylated all GluA1  
1198 regardless of LARGE co-expression, and there was no difference in the amount of  
1199 Endo-H-sensitive and -insensitive forms of GluA1 with co-expression of LARGE. In  
1200 addition to N-linked glycosylation of GluA1, O-linked glycosylation of GluA1 was  
1201 analyzed using O-glycosidase (O-Gly). The size of a GluA1 band was not changed  
1202 by O-Gly treatment, suggesting that GluA1 does not have O-glycosylation. Co-  
1203 expression of LARGE did not changed the O-glycosylation status of GluA1. Method:  
1204 In HEK293T cells, myc-GluA1 and LARGE were expressed by transfection of their  
1205 plasmids. From the lysate of the cells, myc-GluA1 was immunoprecipitated and  
1206 treated with Endo-F (500 unit) and Endo H (500 unit) at 37°C for 2 hours, or with O-  
1207 Gly (50000 unit) followed with SDS-PAGE and Western blot analyses.

1208

1209 **Figure 5-figure Supplementary 1.** Electrophysiological analyses after knockdown  
1210 of *LARGE* at CA1 of hippocampus. **(A)** AMPA-R fEPSP amplitudes were significantly  
1211 increased by LARGE KD. Input-output curves shown relating stimulus strength to  
1212 fEPSPs (output amplitude), which is greater in a LRG shRNA group ( $n = 5$ , 5 mice;  
1213 Two-way repeated-measures ANOVA with post hoc Bonferroni  $t$ -test,  $*P < 0.05$ ,  $**P$   
1214  $< 0.001$ ). **(B)** Intact short-term plasticity. Mean PPR (FP2/FP1) of fEPSPs plotted as  
1215 a function of inter-pulse. Field potential (FP) data are mean  $\pm$  s.e.m. (group:  $P =$   
1216  $0.565$ , group  $\times$  interval:  $P = 0.170$ ,  $n=5$ , 5). **(C)** LARGE did not affect inhibitory  
1217 synaptic strength. mIPSC recordings from Cont, shRNA, and Rescue. No significant

1218 differences in mIPSC amplitude and frequency were observed among the groups.  
1219 Three different groups were recorded using 27 coverslips in 3 batches of neuronal  
1220 culture (1098, 1080, 1055 events from  $n = 12$ ,  $n=12$ ,  $n=11$  neurons, respectively;  
1221 Amplitude,  $F_{(2,32)}=0.553$ ,  $P =0.58$ ; Frequency,  $F_{(2,32)}=0.292$ ,  $P=0.749$ ). Scale bar =  
1222 30  $\mu\text{m}$ .

1223

1224 **Figure 5-figure supplementary 2.** Confocal image analyses demonstrated the  
1225 effect of *LARGE* KD on structural synaptic plasticity. Confocal images of cultured  
1226 hippocampal neurons showed that *LARGE* KD (shRNA) significantly increase not  
1227 the number of spines but the size of spines compared to that of control neurons,  
1228 which was reversed by *LARGE* rescue ( $n = 7, 7, 7$  neurons; One-way ANOVA,  $*P <$   
1229  $0.01$ ,  $**P < 0.005$ ). In the cultured hippocampal neurons, neuronal dendrites and  
1230 spines was visualized by GFP. PSD95 is synaptic marker. MAP2 is dendrite marker.  
1231 Scale bar = 10 $\mu\text{m}$ .

1232

1233 **Figure 6-figure supplementary 1** Confirmation of knockdown efficiency of *LARGE*  
1234 shRNA after *in vivo* electrophysiology analyses and behavior tests. **(A)**  
1235 Immunohistochemistry and RT-PCR analysis of mouse hippocampal CA1 region  
1236 infected with AAV. Confocal images showed the location and diffusion range of AAV  
1237 microinjected into CA1. Endogenous *LARGE* mRNA expression in CA1 was  
1238 significantly knocked down by infection of AAV expressing *LARGE* shRNA with GFP  
1239 (shRNA) ( $n = 3, 3$  mice; Two tailed t-test,  $*P < 0.001$ ). Scale bar = 100  $\mu\text{m}$  (left), 50

1240  $\mu\text{m}$  (right). **(B)** Digital image and Western blot analysis of hippocampal CA1 region  
1241 of rat brain infected with AAV. Brain slices were imaged by digital imaging under a  
1242 blue LED light. Strong and specific expression of GFP in hippocampi indicated  
1243 specific delivery and expression of *LARGE* shRNA with GFP by AAV injection.  
1244 Western blot analyses confirmed knockdown of *LARGE* in GFP-expressing  
1245 hippocampi ( $n = 3$ , 3 rats; Two tailed t-test,  $*P < 0.005$ )

1246

1247 **Figure 6-figure supplementary 2** The absence of a significant difference in shock  
1248 threshold among groups demonstrated that *LARGE* expression status did not affect  
1249 fear conditioning. **(A)** Schema of shock threshold tests of animals. Shocks (gray  
1250 blocks) were delivered every 30 s, with intensity increasing from 0.1 mA to 1.0 mA  
1251 (4:28, 4:58) and decreasing back to 0.1 mA (10:30). **(B)** Regardless of genotype or  
1252 injected AAV, all animals responded to shocks in a similar way. The shock intensity  
1253 thresholds for jumping, vocalization, and flinching were measured for wild type (+/+),  
1254 heterozygous (+/-), and knockout (-/-) animals and animals injected with AAV  
1255 expressing scrambled shRNA with GFP (Cont) or *LARGE* shRNA with GFP (shRNA).

1256

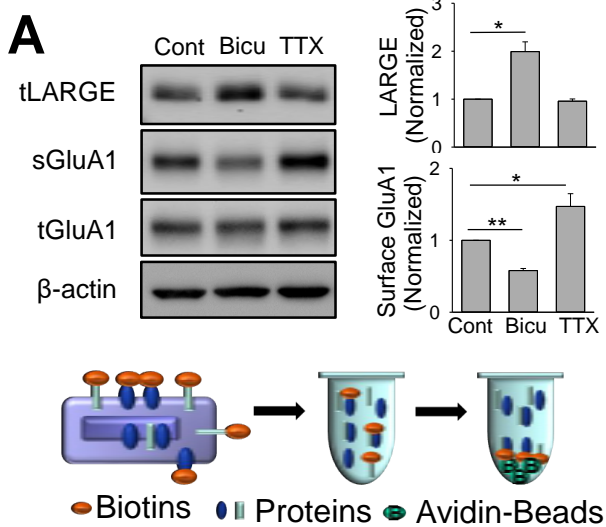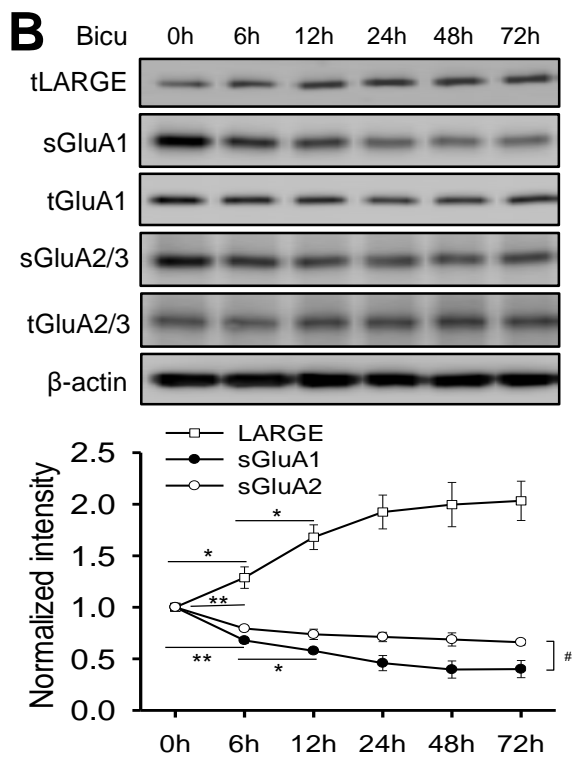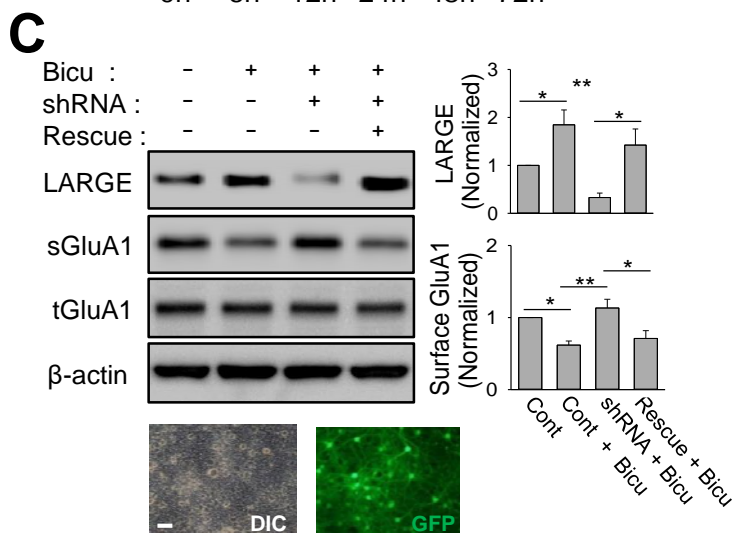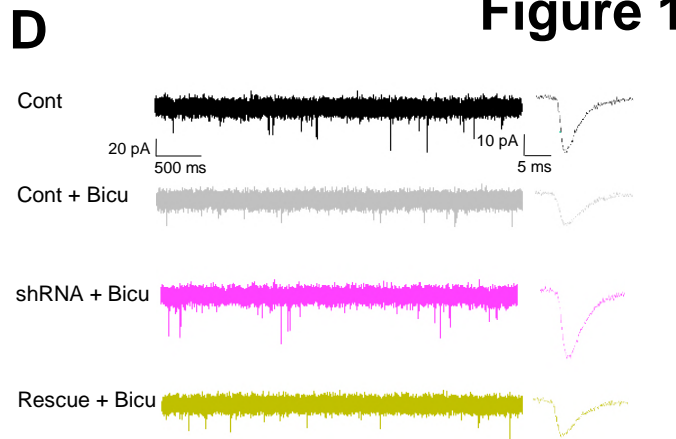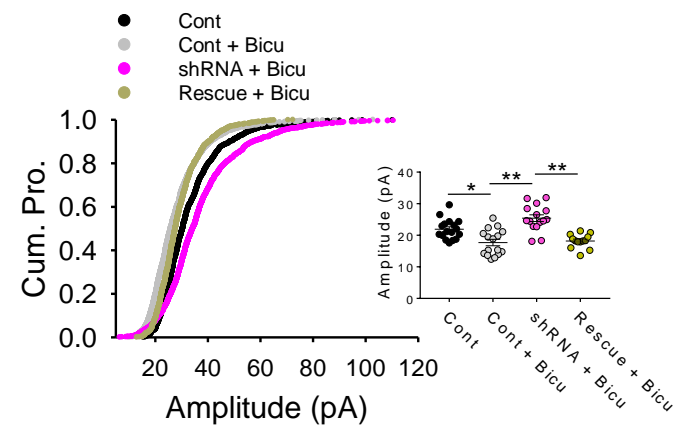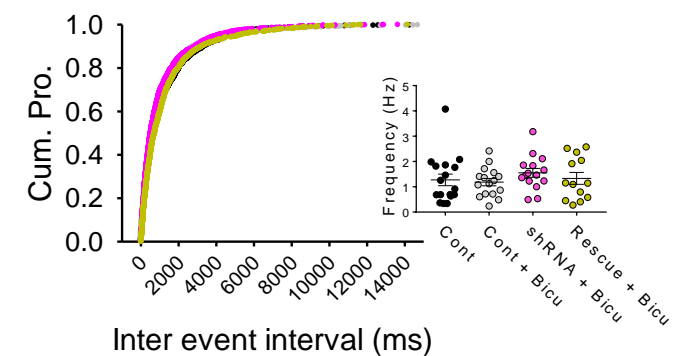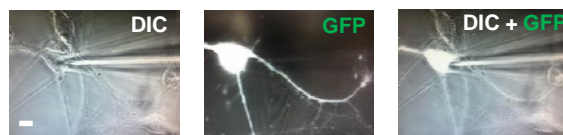



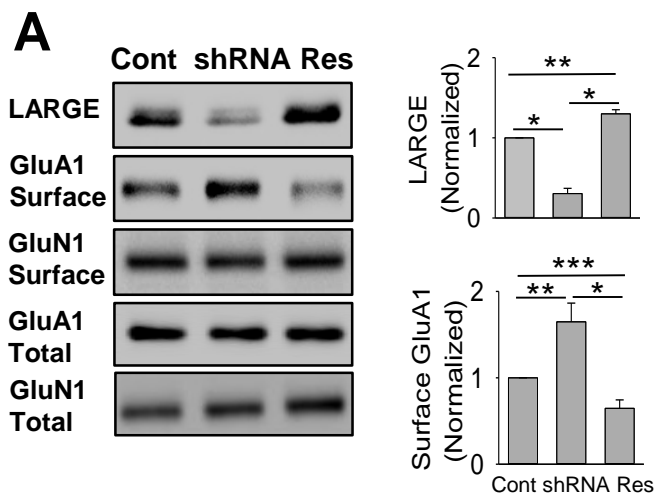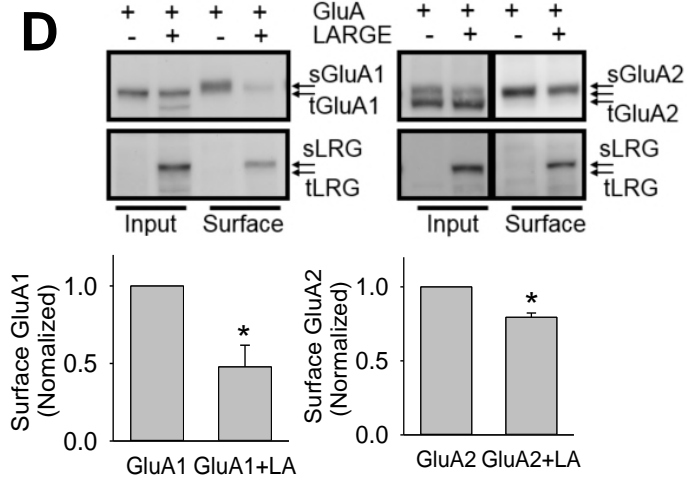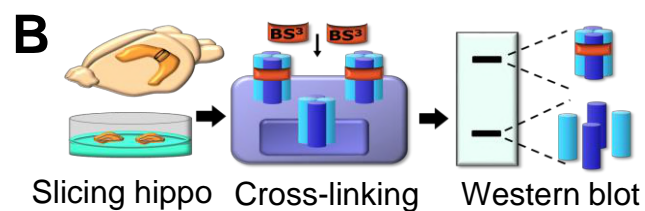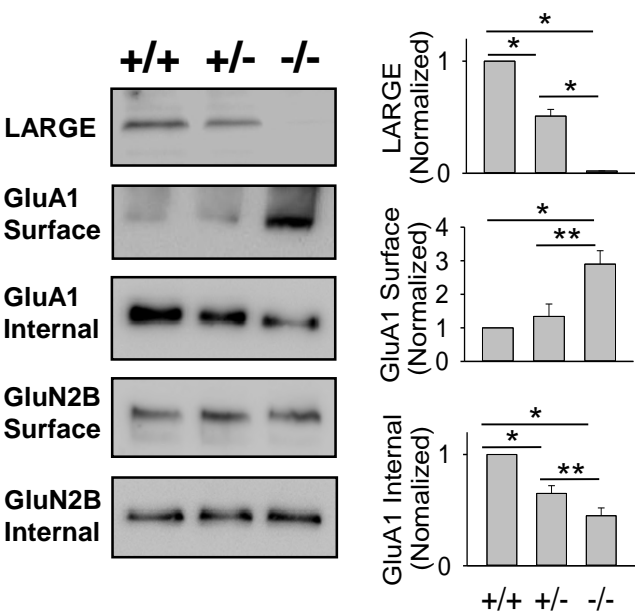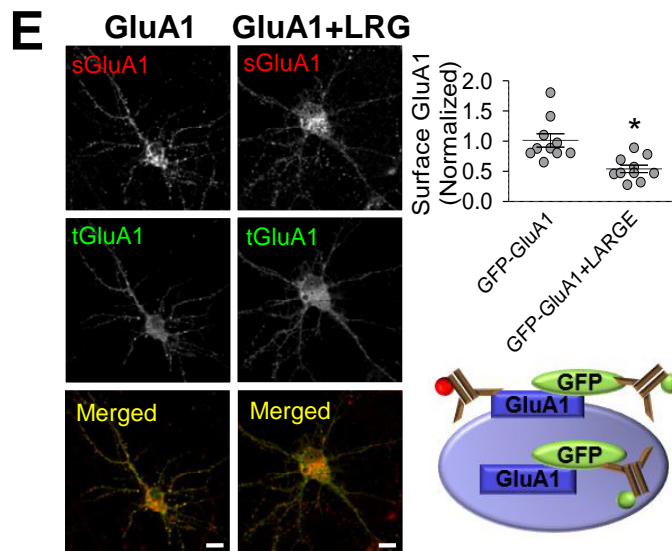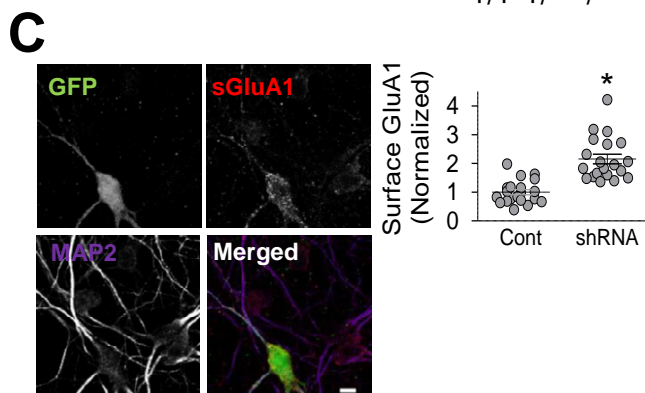



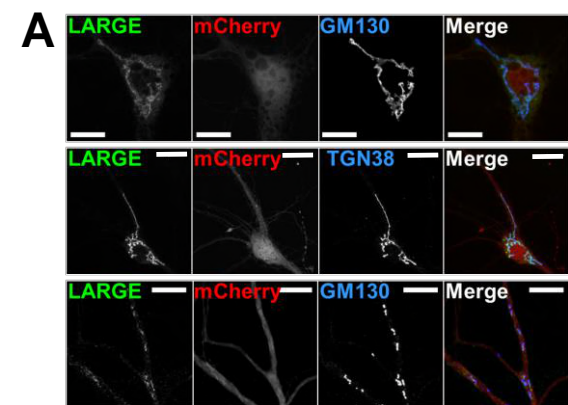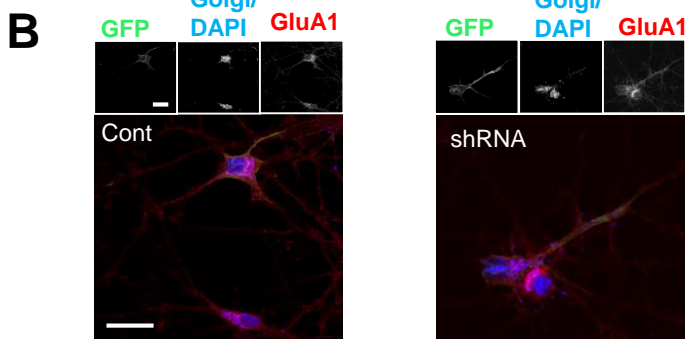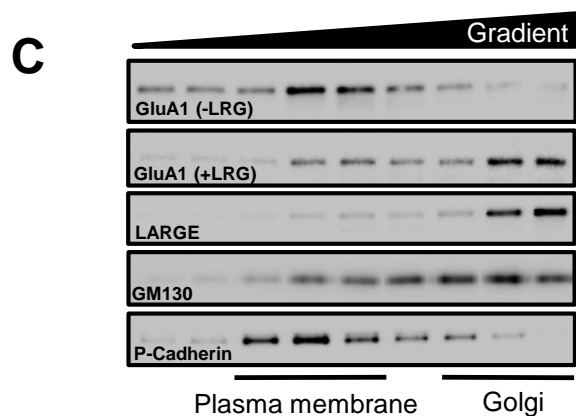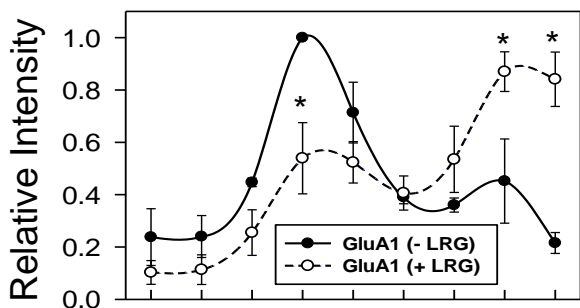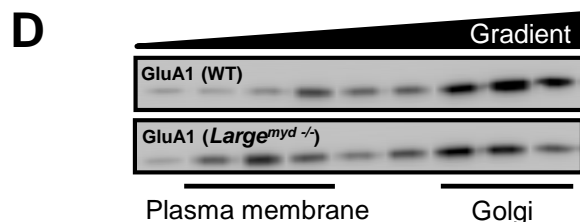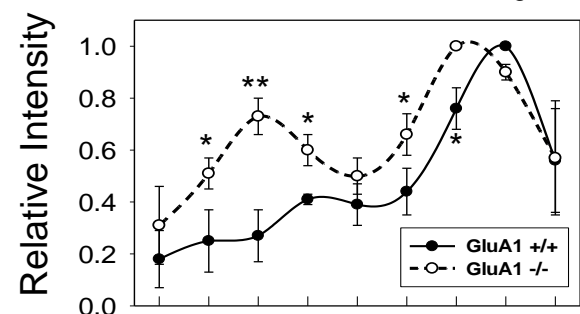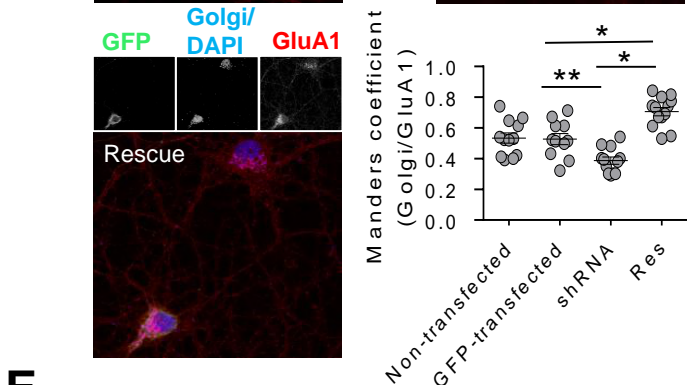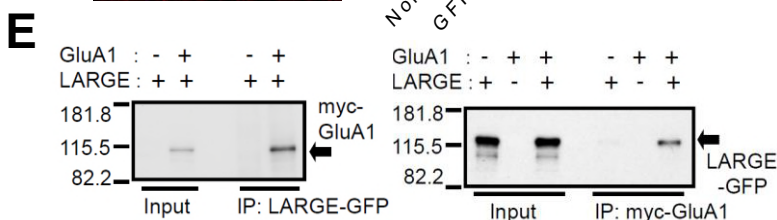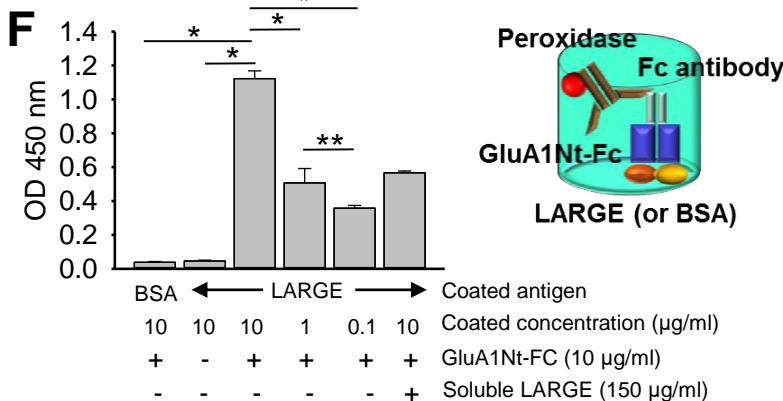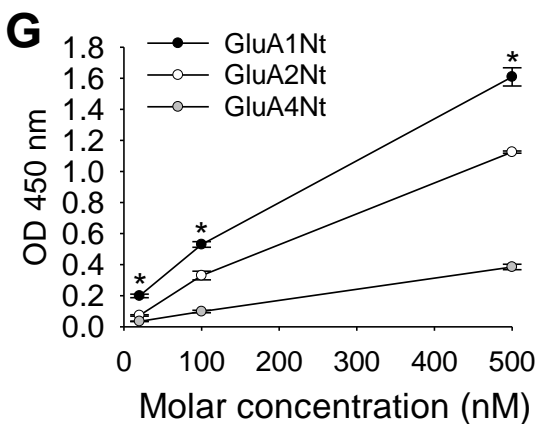

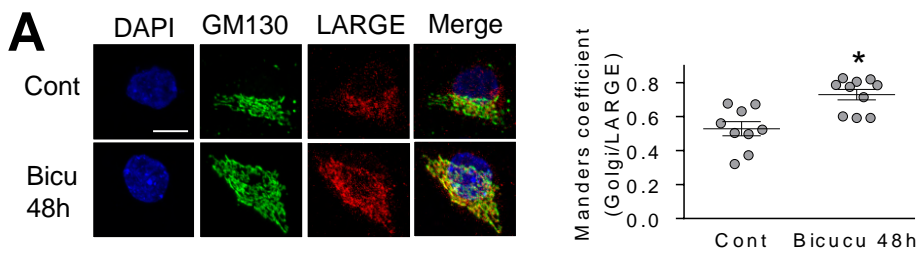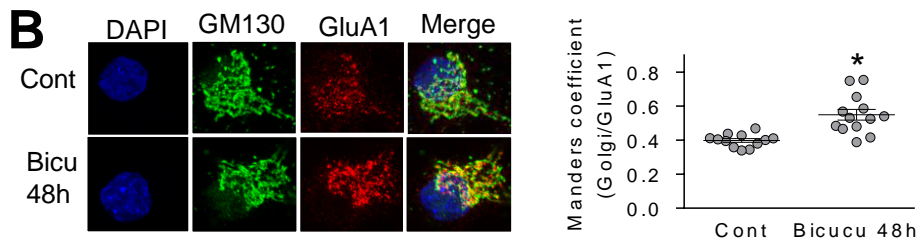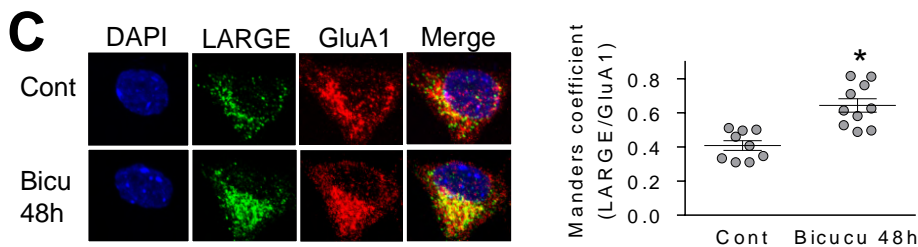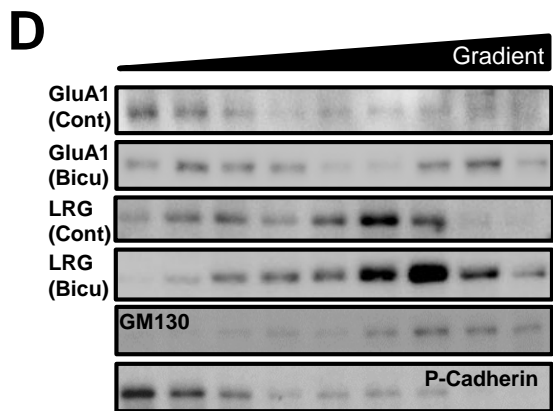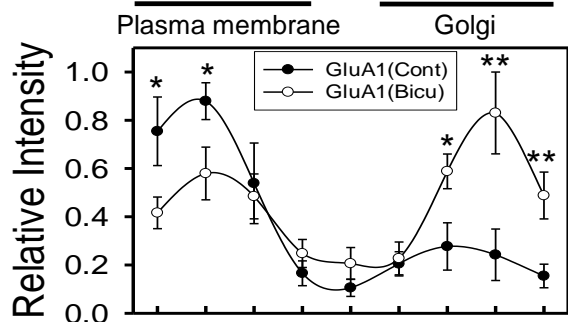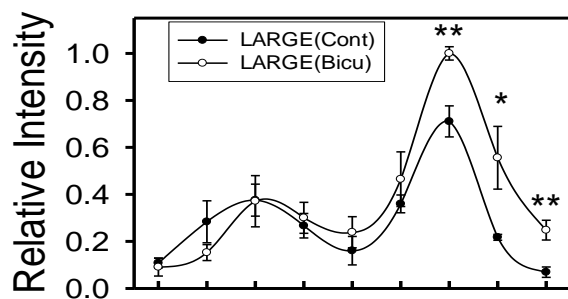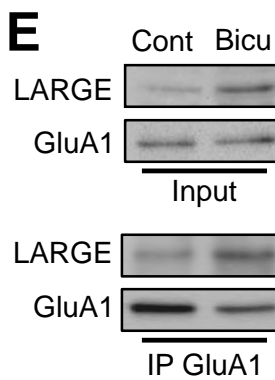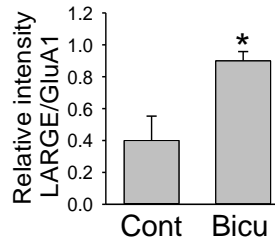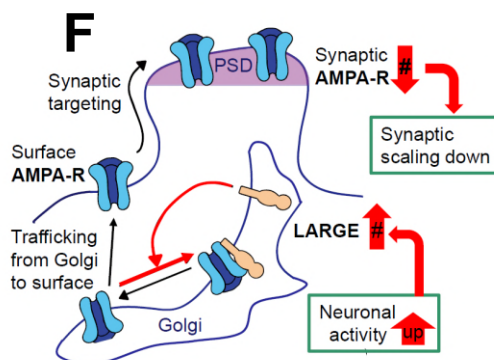

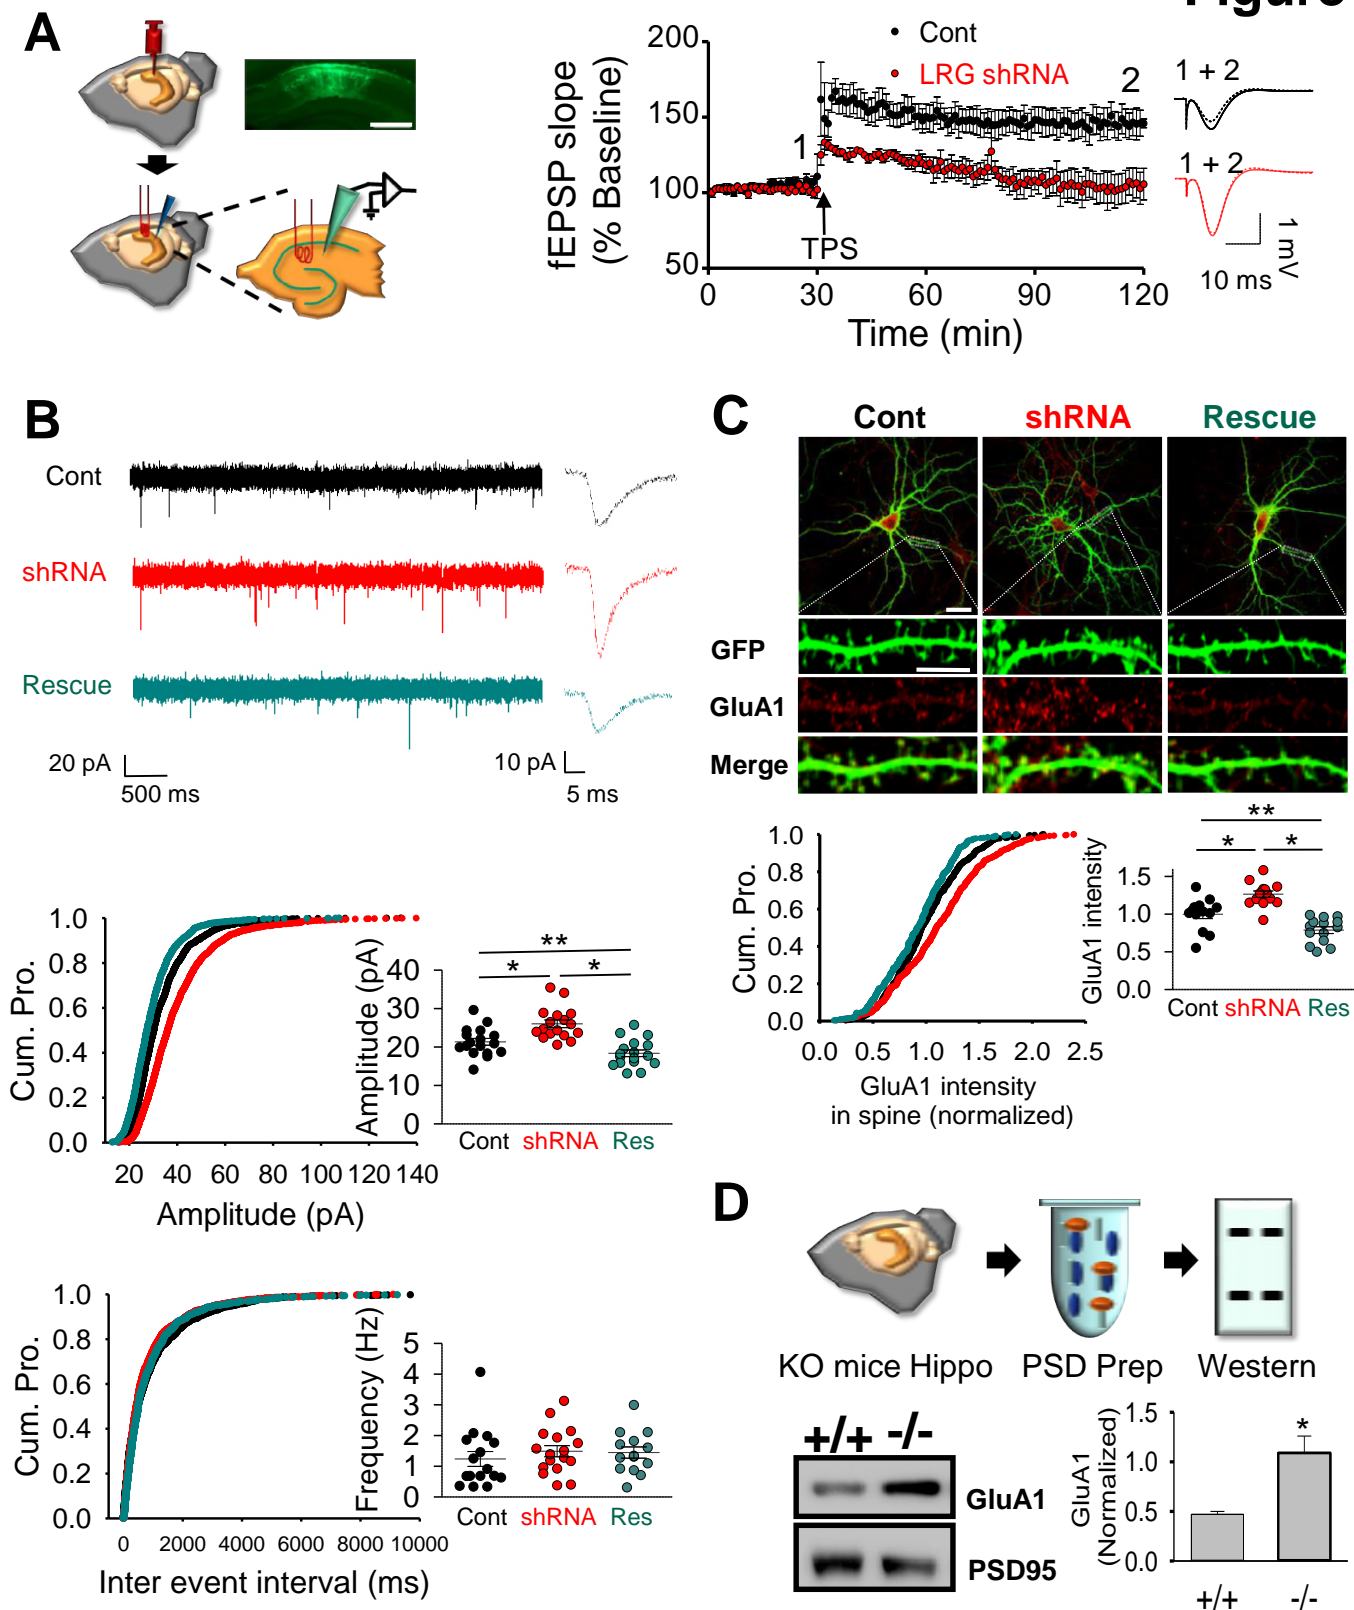

**Figure 6**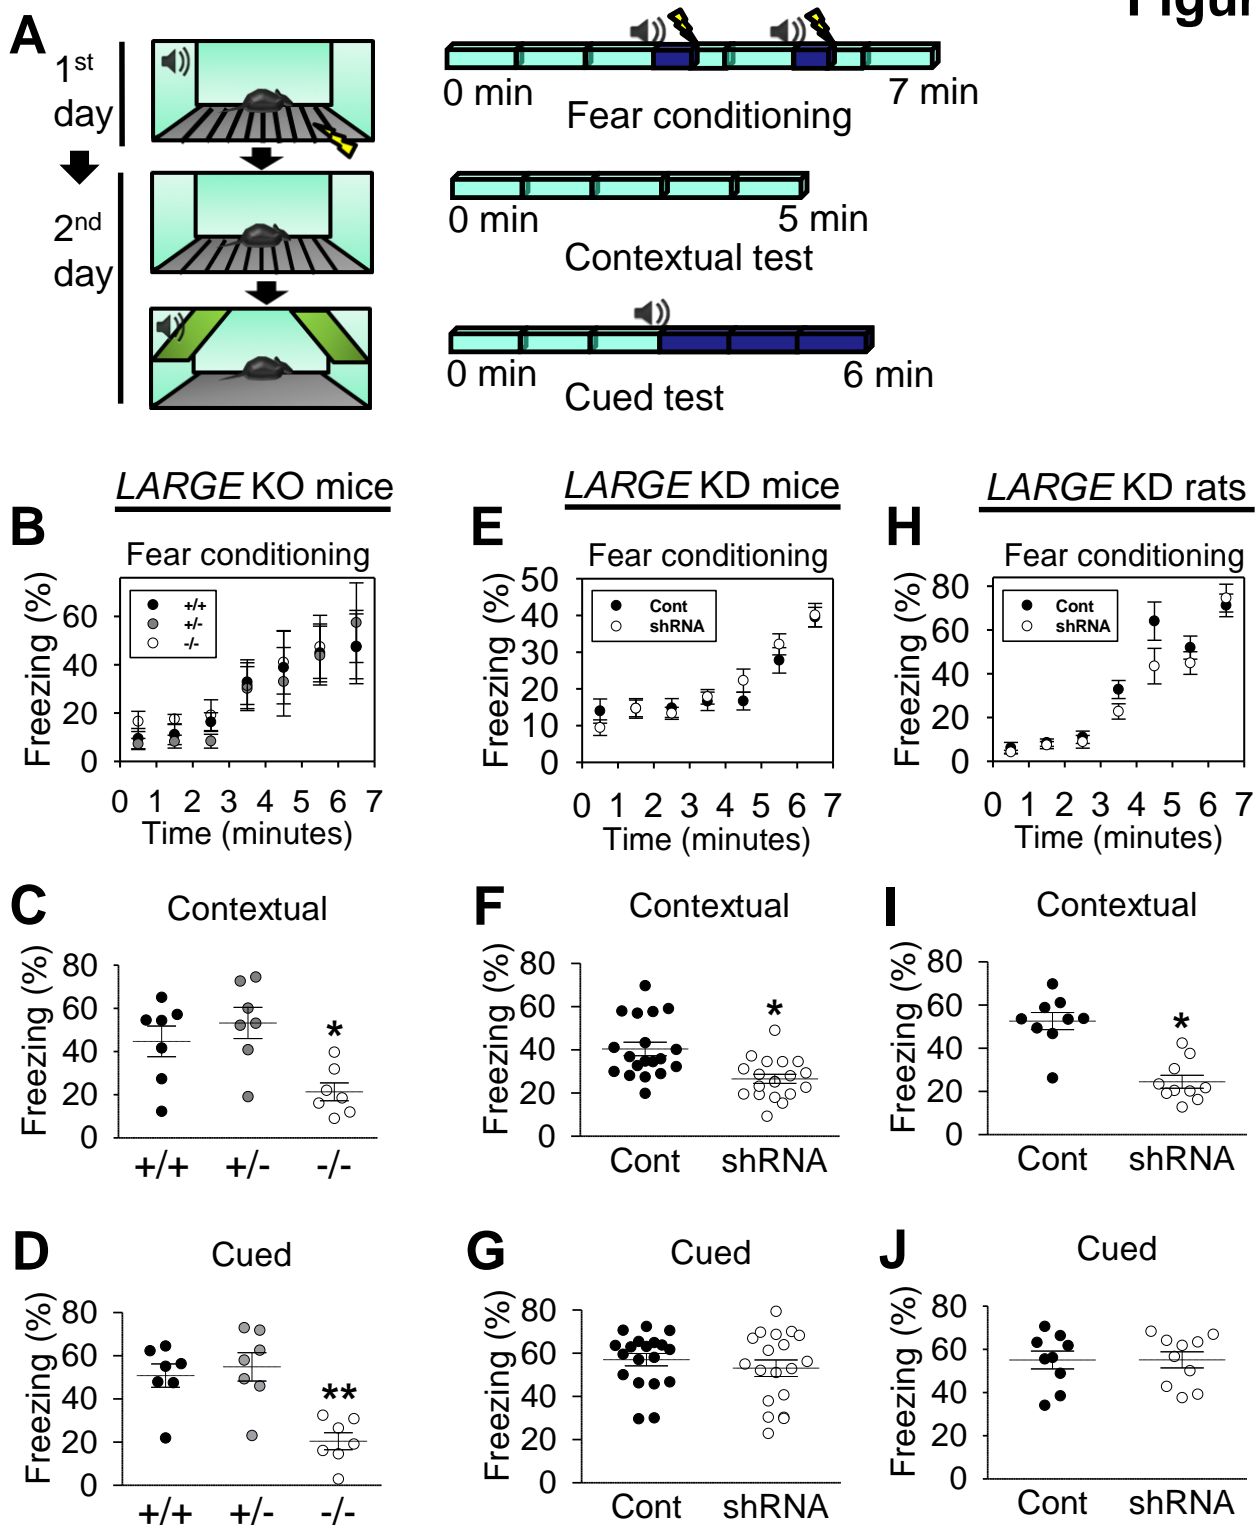

**A** Open Field

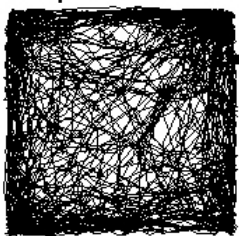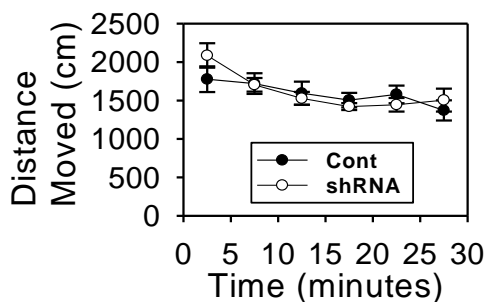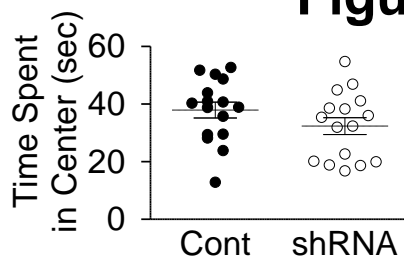

**B** Working Memory

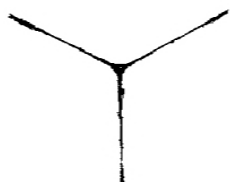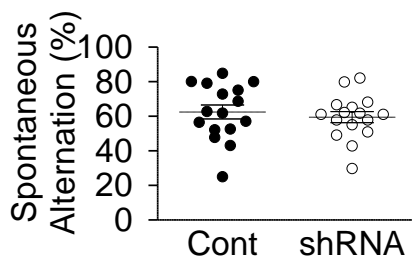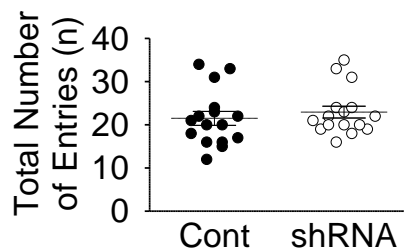

**C** Simple novelty preference

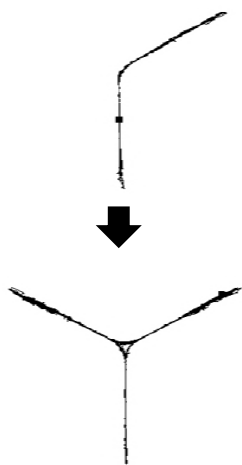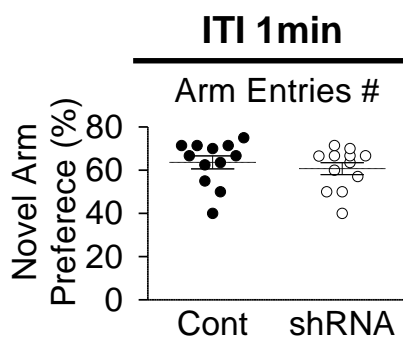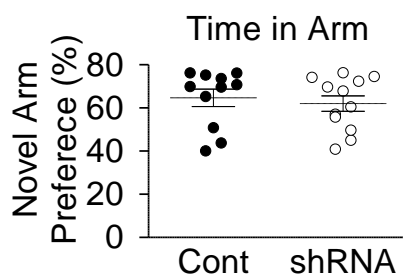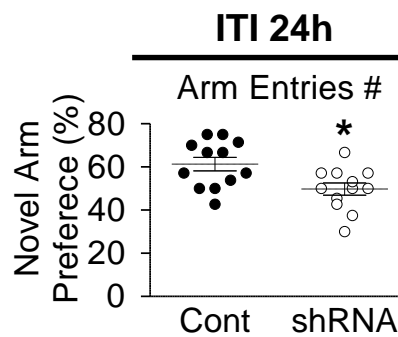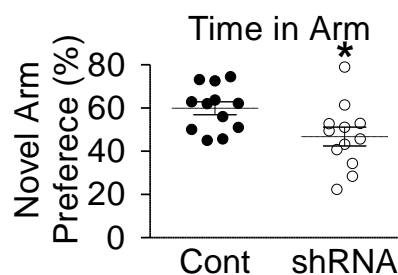

**D** Novel Object Recognition

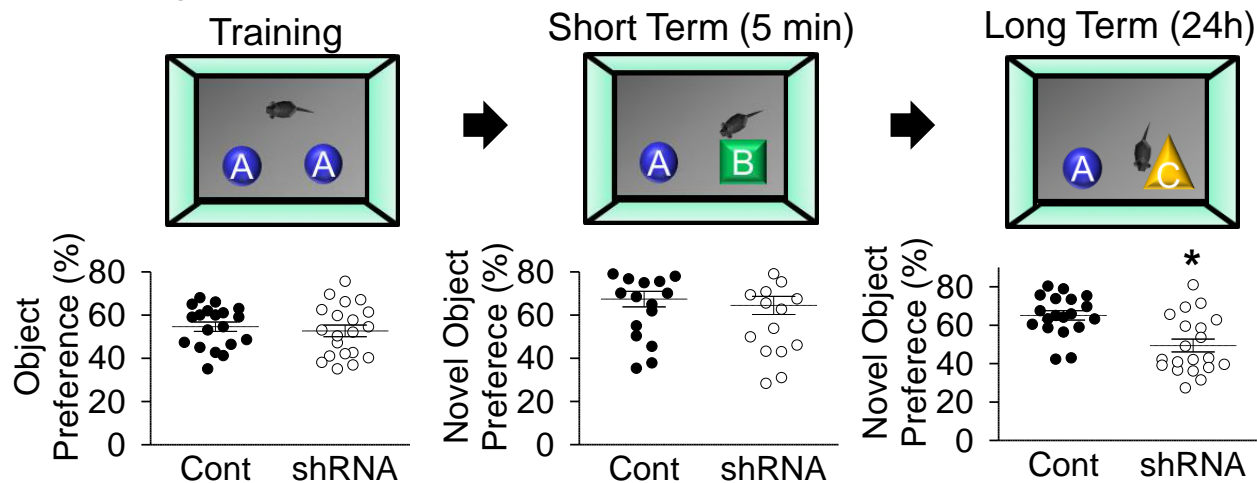



## Figure 1-figure supplementary 1

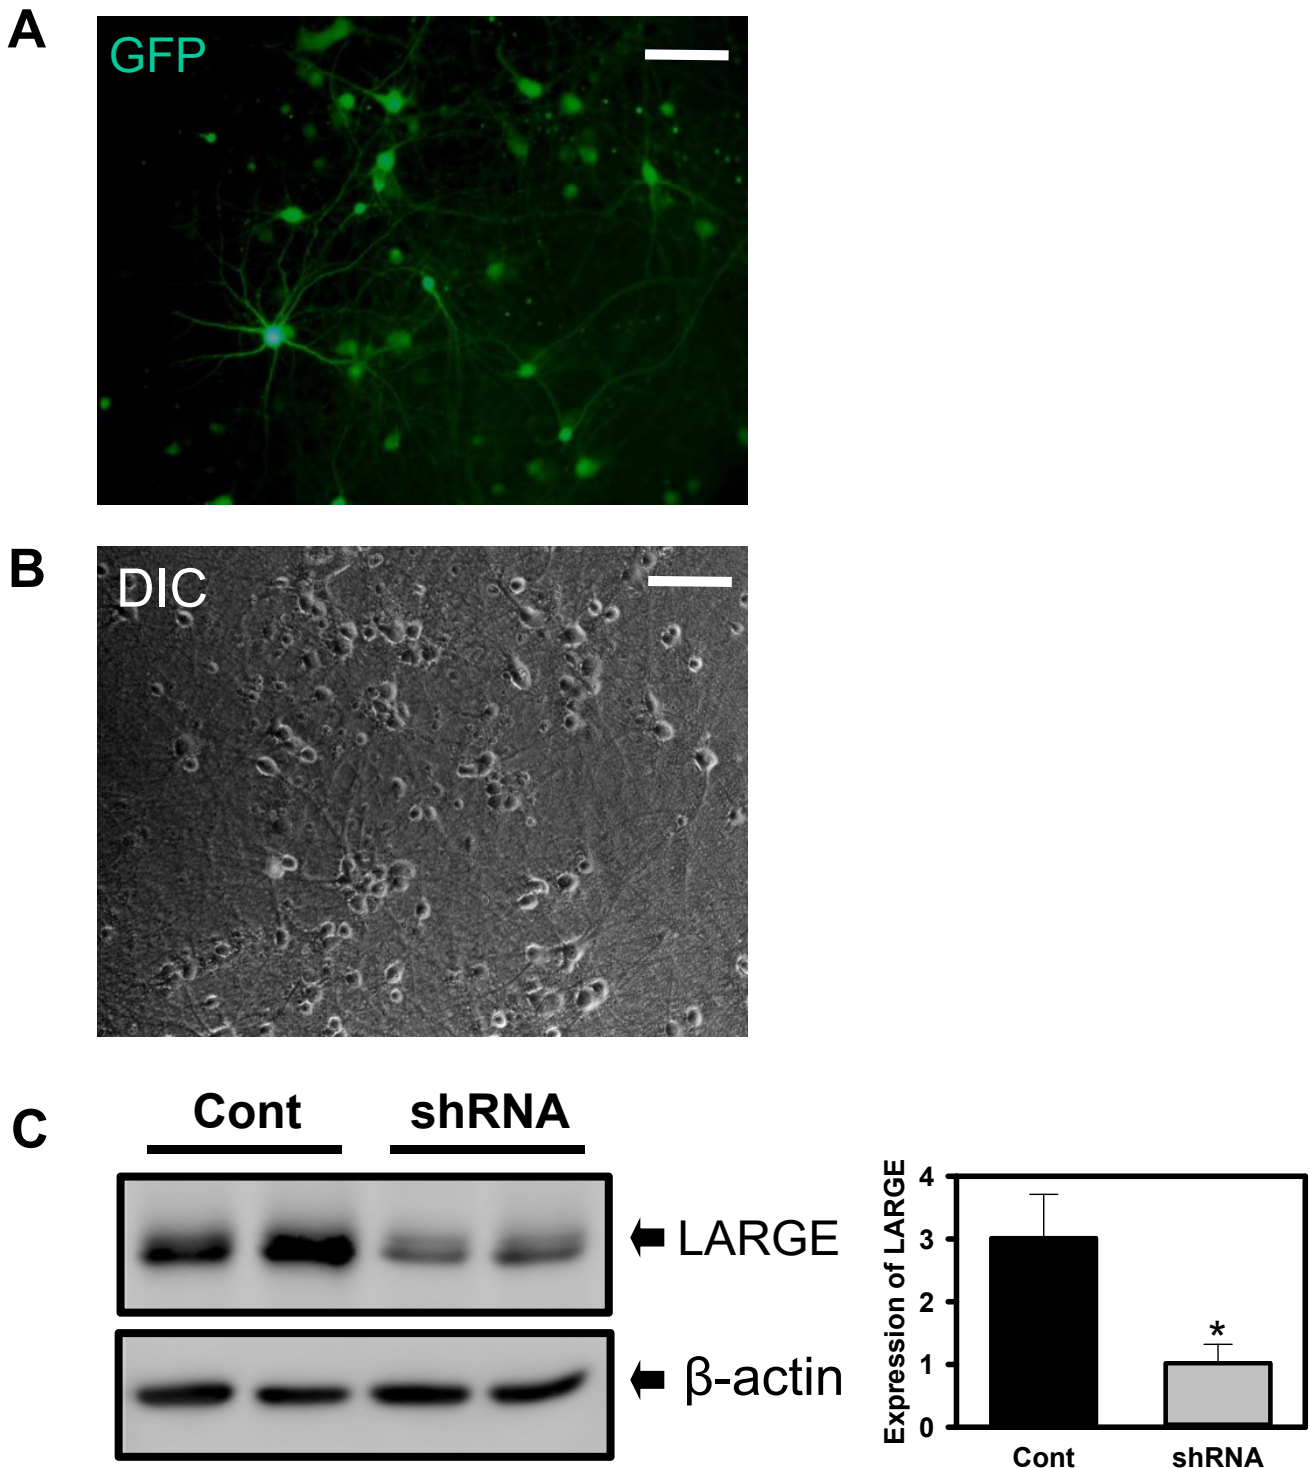

## Figure 1-figure supplementary 2

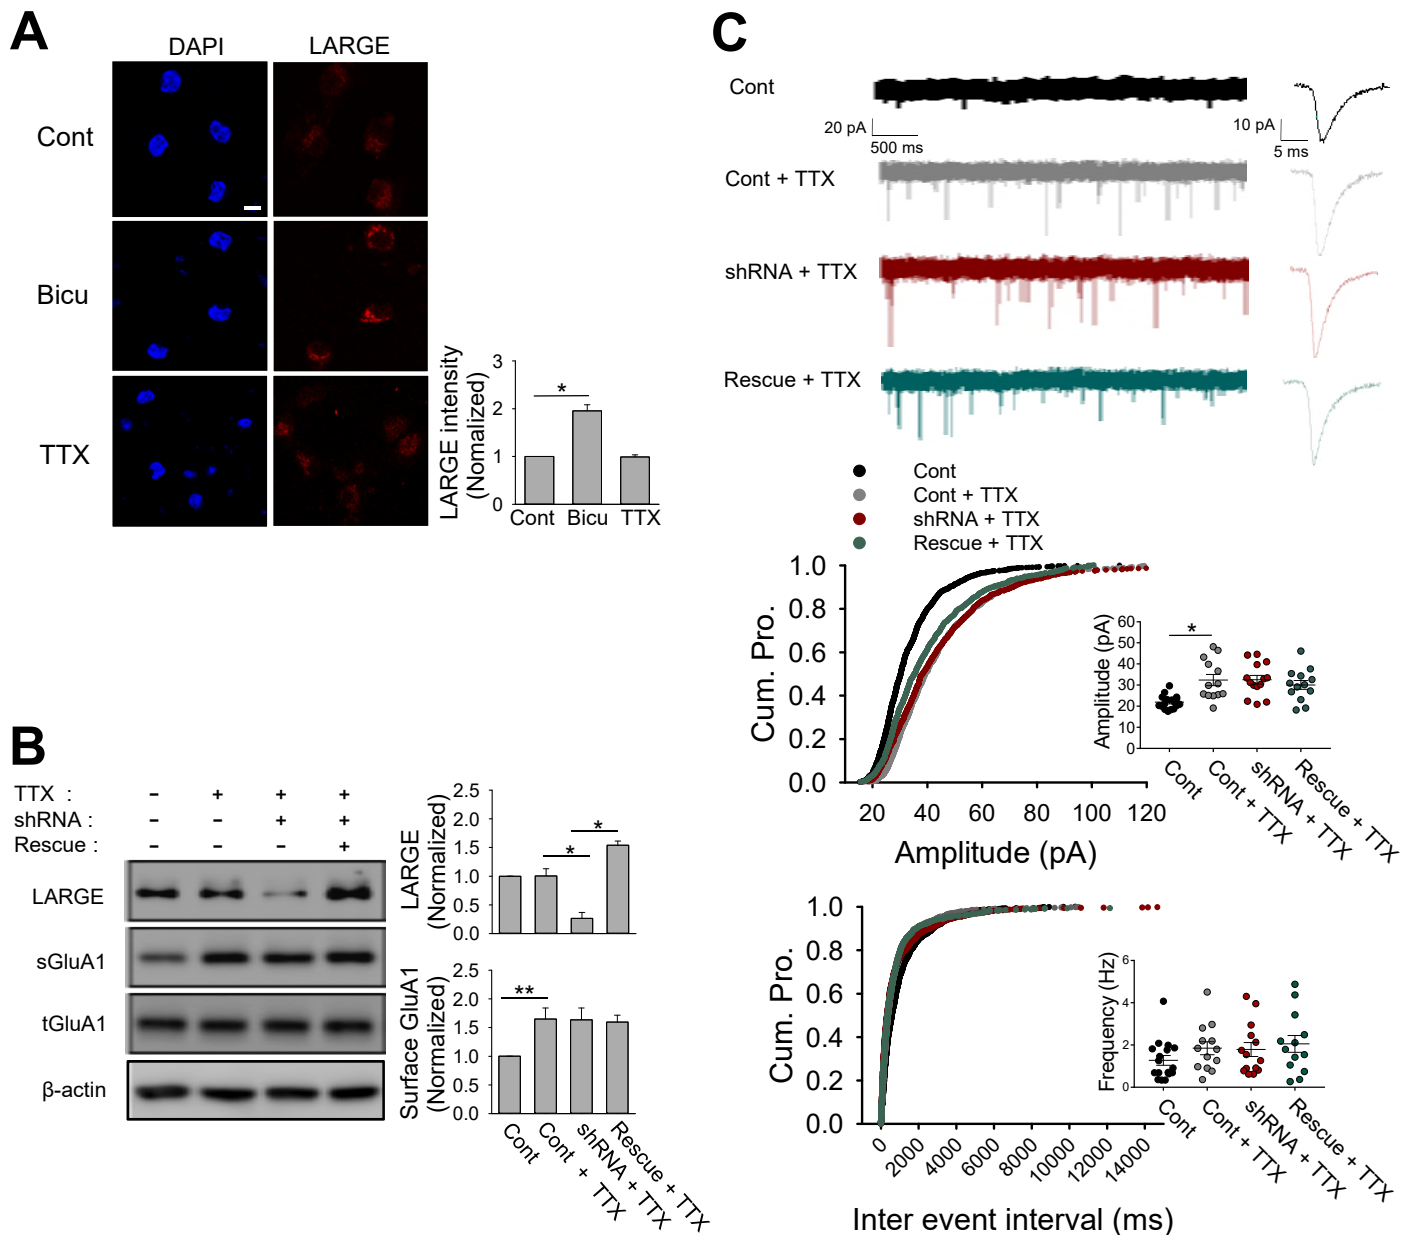

**Figure 1-figure supplementary 2.** LARGE is necessary for neuronal homeostatic scaling-down but not for scaling-up. (A) Confocal images of cultured hippocampal neurons confirmed the increase in LARGE expression in response to Bicu but not TTX ( $n = 13, 13, 13$  neurons; Mann–Whitney rank sum test,  $T = 91, U = 0, *P < 0.001$ ; Blue: DAPI, red: endogenous LARGE). Scale bar =  $10 \mu\text{m}$ . (B) The TTX-induced increase in surface GluA1 was not affected by LARGE shRNA or LARGE rescue. ( $n = 3$ ; one-way ANOVA,  $*P < 0.001, **P = 0.027$ ). (C) The TTX-induced increase in mEPSC amplitude was not affected by LARGE KD or rescue (1300, 1270, 1300, and 1279 events from  $n = 17, 13, 14,$  and  $13$  neurons, respectively; one-way ANOVA; amplitude,  $F(3,53) = 7.783, *P < 0.001$ ; frequency;  $F(3,53) = 1.211, P = 0.315$ ). The mEPSC traces and cumulative and scattered plots are shown. Nine different groups were recorded using 60 coverslips from three batches of neuronal culture.

## Figure 1-figure supplementary 3

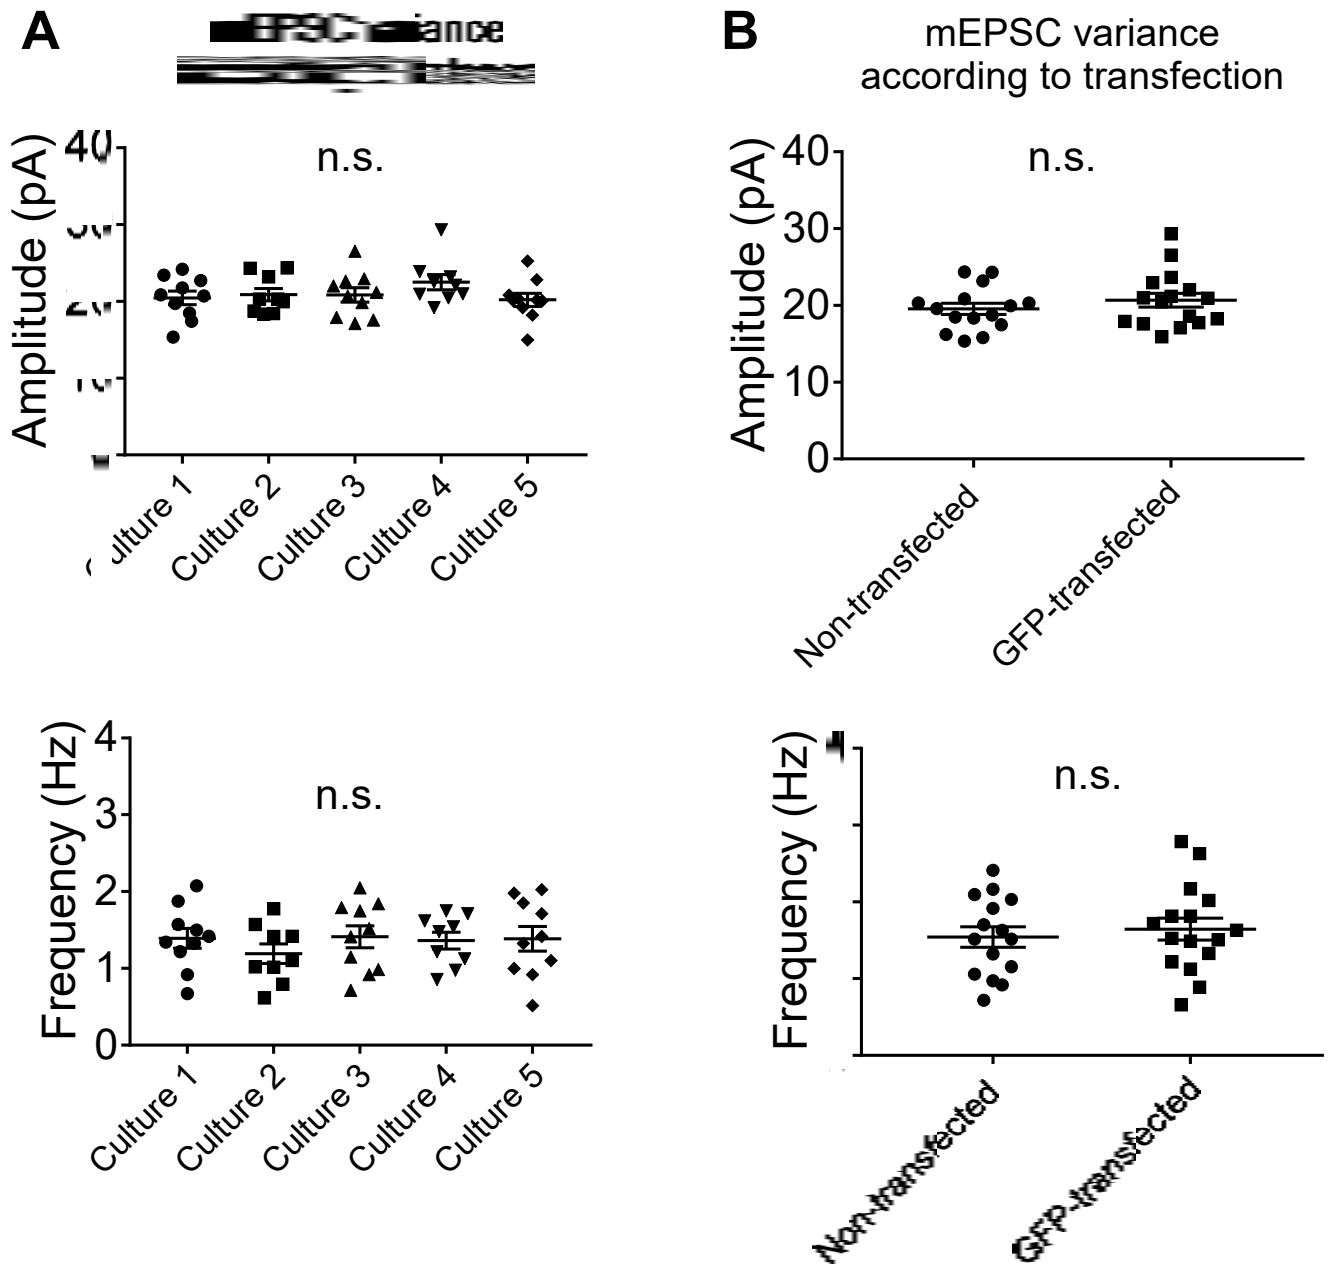

**Figure 1-figure supplementary 3.** Verification of low-level batch-to-batch variation in our mEPSC experiments. (A) The amplitude and frequency did not vary among the batches used in experiments (B) The amplitude and frequency did not vary between non-transfected and GFP-transfected neurons



## Figure 3-figure supplementary 1

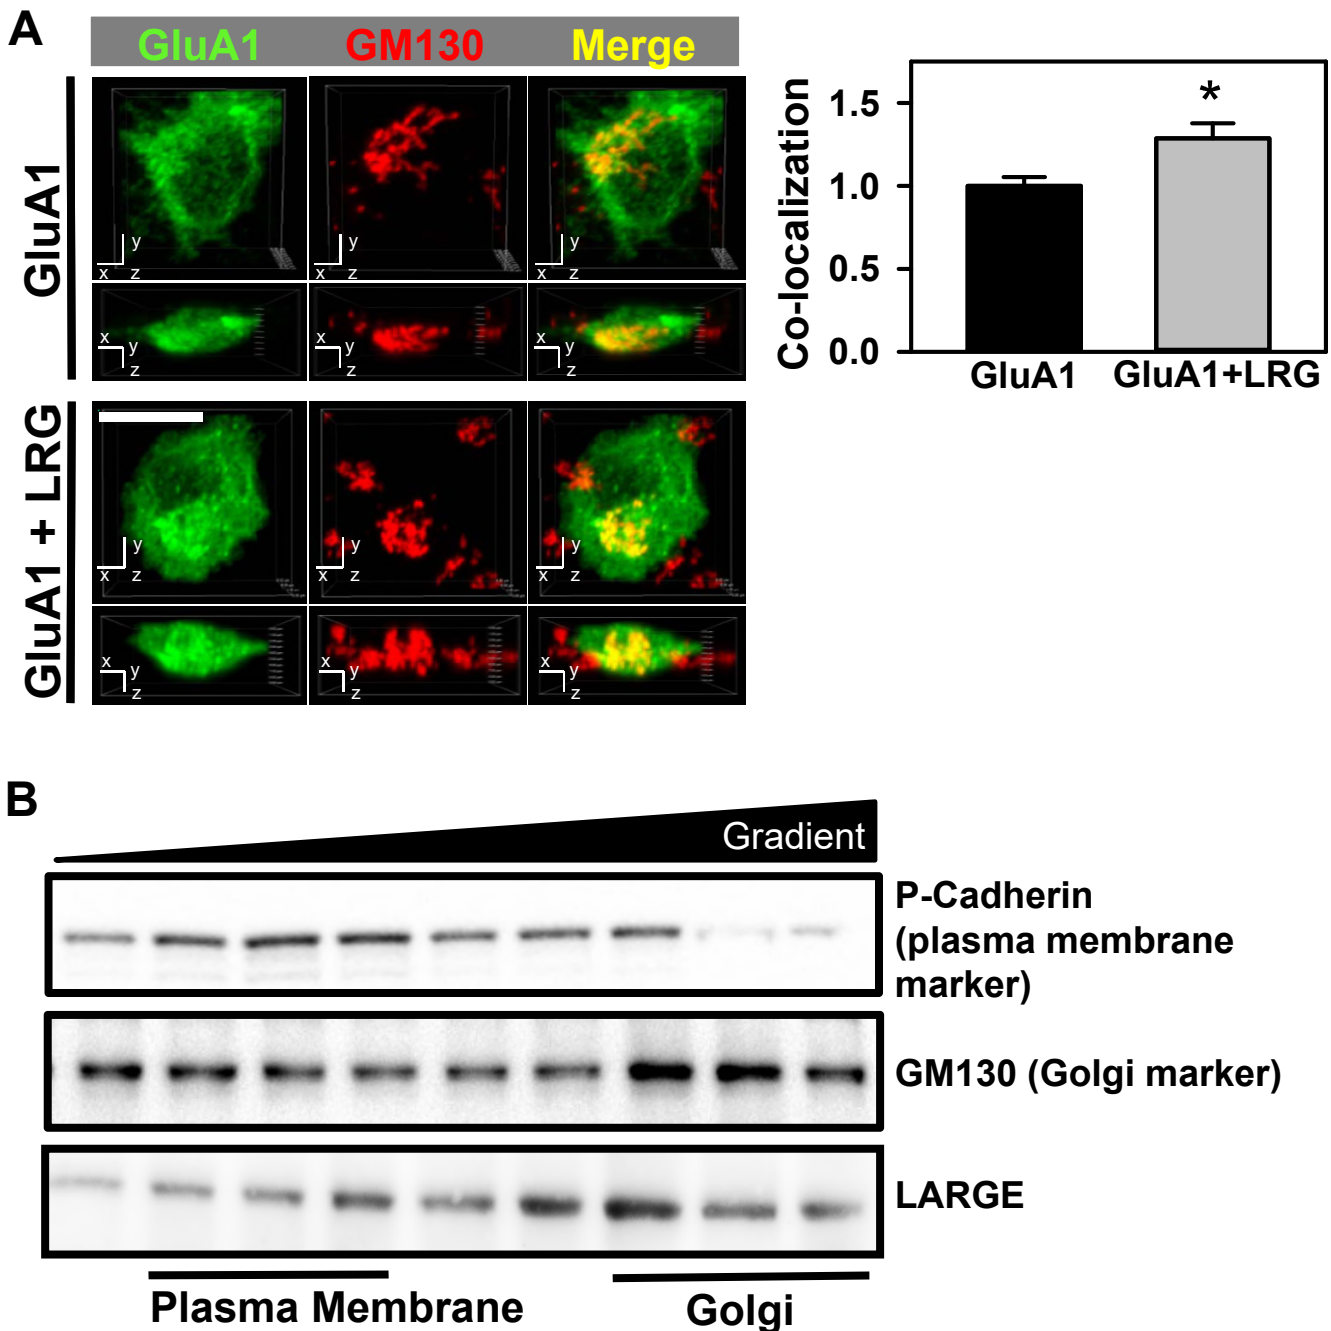

## Figure 3-figure supplementary 2

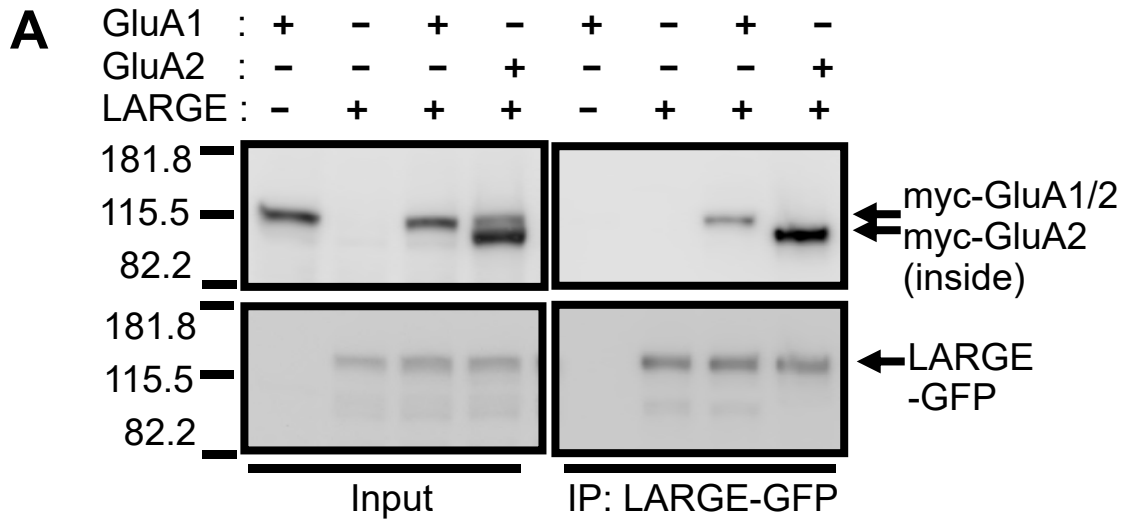

**B**

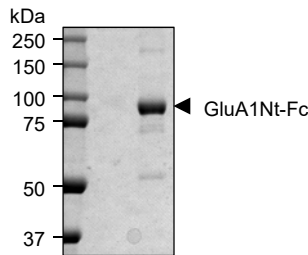

**C**

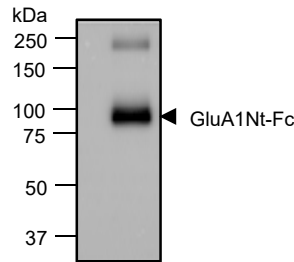

**D**

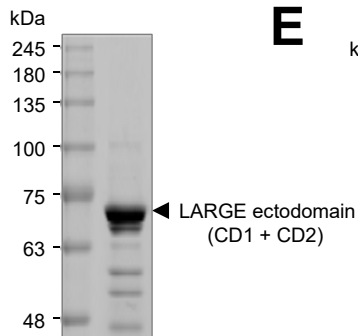

**E**

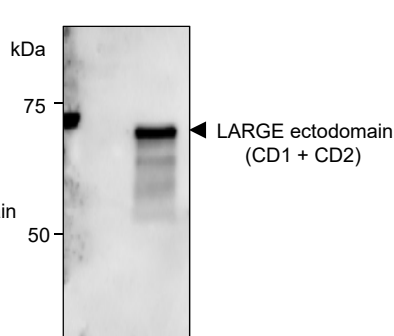

**Figure 3-figure supplementary 2.** LARGE directly interacts with AMPA-R subunits. (A) LARGE interacted with GluA2 inside of cell (lower band) but not with GluA2 at the plasma membrane (upper band). Analysis of LARGE association with AMPA-R determined by immunoprecipitation (IP). HEK293T cells were transfected with myc-GluA1, myc-GluA2, and/or LARGE-GFP. IP with anti-GFP antibody. Both GluA1 and GluA2 were co-immunoprecipitated with LARGE-GFP. As see in Input, GluA2 yield two bands (upper and lower bands). Most GluA2 co-immunoprecipitated with LARGE was GluA2 correspond to intracellular GluA2, judging from its molecular weight. (B-E) Purification of GluA1 and LARGE (catalytic domain 1 [CD1] + CD2) proteins. SDS-PAGE (B) and Western-blot (C) analysis of purified GluA1Nt-Fc fusion protein. SDS-PAGE (D) and Western-blot (E) analysis of purified LARGE.

## Figure 3-figure supplementary 3

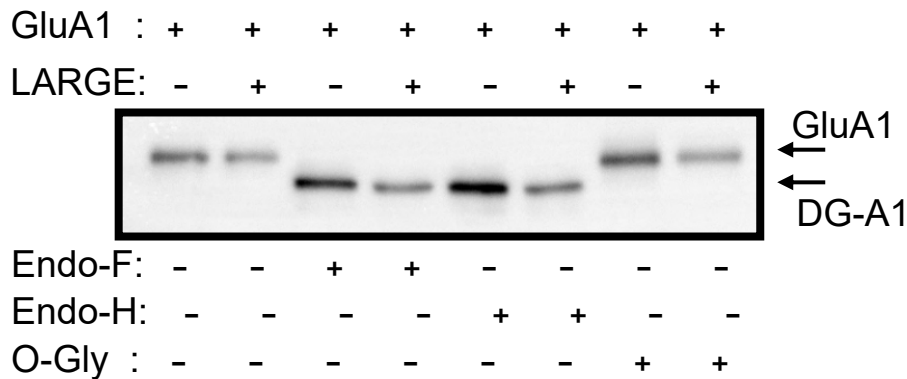

**Figure 3-figure supplementary 3.** LARGE interaction with AMPA-R did not change glycosylation of AMPA-R. No change in N- and O-glycosylation of GluA1 with co-expression of LARGE in HEK293T cells. N-linked glycosylation of GluA1 was analyzed using two de-glycosylation enzymes, endoglycosidase F (Endo-F) and endoglycosidase H (Endo-H). Endo-F completely de-glycosylated all GluA1 regardless of LARGE co-expression, and there was no difference in the amount of Endo-H-sensitive and -insensitive forms of GluA1 with co-expression of LARGE. In addition to N-linked glycosylation of GluA1, O-linked glycosylation of GluA1 was analyzed using O-glycosidase (O-Gly). The size of a GluA1 band was not changed by O-Gly treatment, suggesting that GluA1 does not have O-glycosylation. Co-expression of LARGE did not change the O-glycosylation status of GluA1. Method: In HEK293T cells, myc-GluA1 and LARGE were expressed by transfection of their plasmids. From the lysate of the cells, myc-GluA1 was immunoprecipitated and treated with Endo-F (500 unit) and Endo H (500 unit) at 37°C for 2 hours, or with O-Gly (50000 unit) followed with SDS-PAGE and Western blot analyses.

## Figure 5-figure Supplementary 1

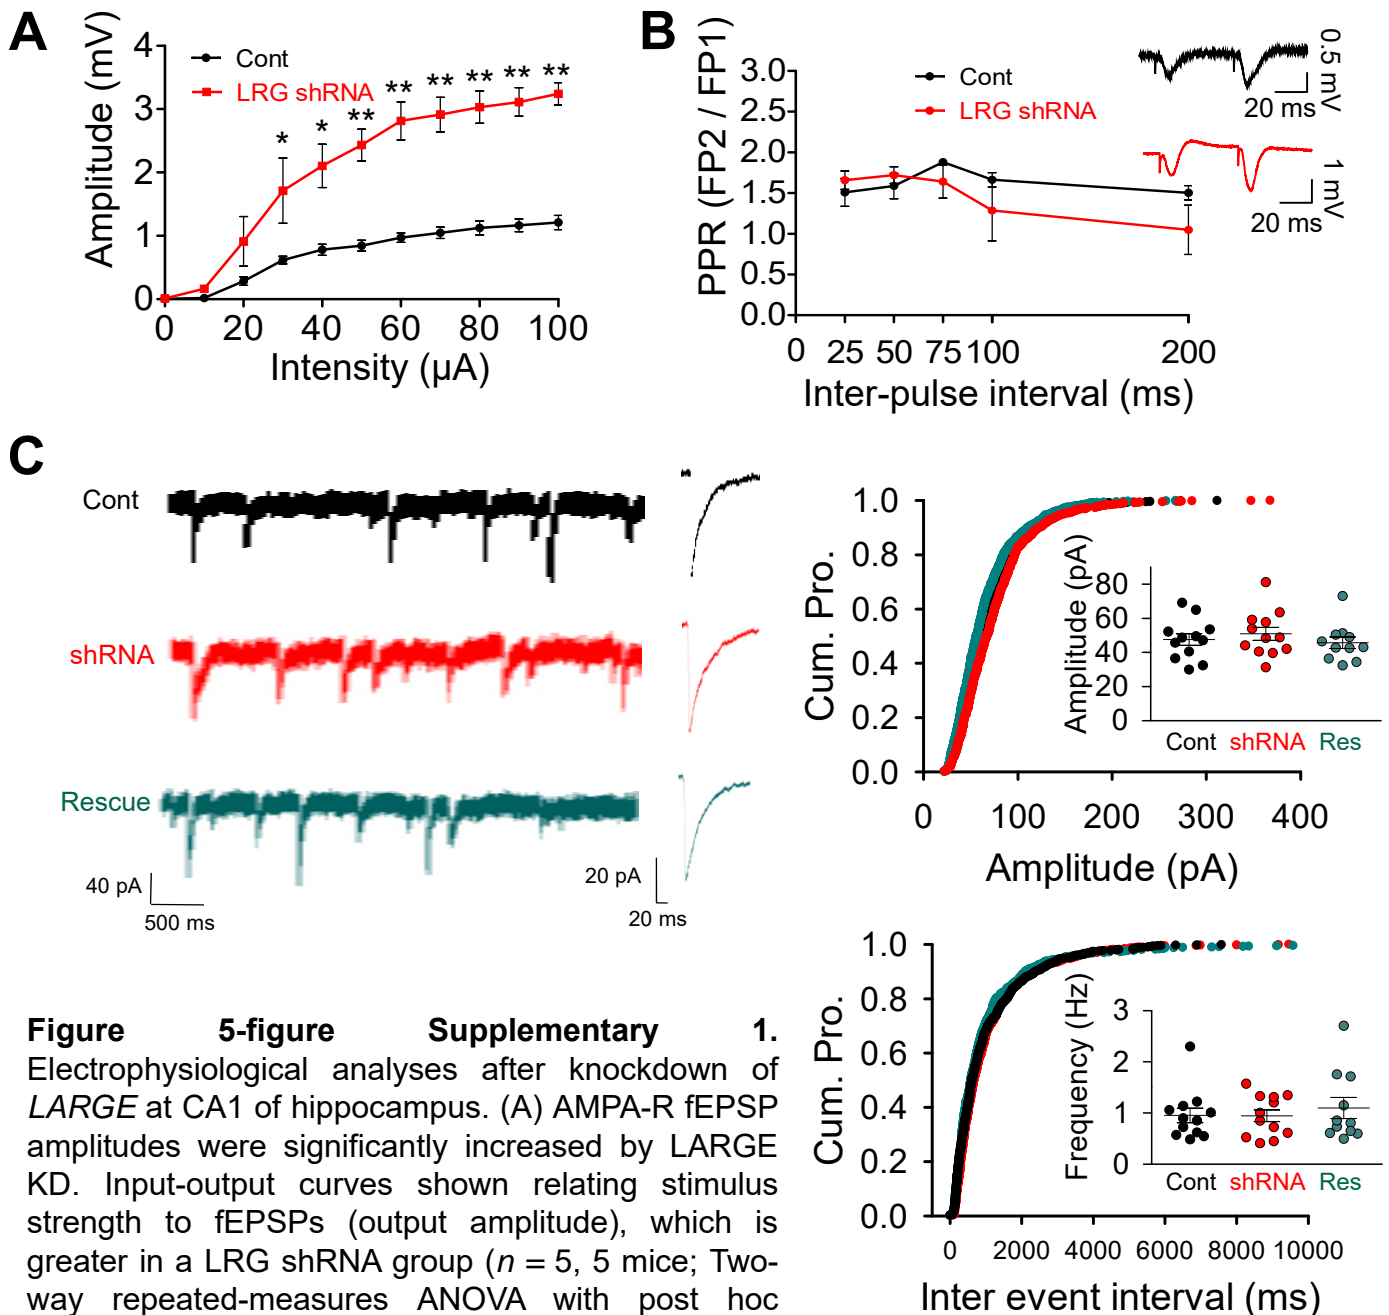

**Figure 5-figure Supplementary 1.** Electrophysiological analyses after knockdown of *LARGE* at CA1 of hippocampus. (A) AMPA-R fEPSP amplitudes were significantly increased by LARGE KD. Input-output curves shown relating stimulus strength to fEPSPs (output amplitude), which is greater in a LRG shRNA group ( $n = 5$ , 5 mice; Two-way repeated-measures ANOVA with post hoc Bonferroni  $t$ -test,  $*P < 0.05$ ,  $**P < 0.001$ ). (B) Intact short-term plasticity. Mean PPR (FP2/FP1) of fEPSPs plotted as a function of inter-pulse. Field potential (FP) data are mean  $\pm$  s.e.m. (group:  $P = 0.565$ , group x interval:  $P = 0.170$ ,  $n=5$ , 5).

(C) LARGE did not affect inhibitory synaptic strength. mIPSC recordings from Cont, shRNA, and Rescue. No significant differences in mIPSC amplitude and frequency were observed among the groups. Three different groups were recorded using 27 coverslips in 3 batches of neuronal culture (1098, 1080, 1055 events from  $n = 12$ ,  $n=12$ ,  $n=11$  neurons, respectively; Amplitude,  $F_{(2,32)}=0.553$ ,  $P=0.58$ ; Frequency,  $F_{(2,32)}=0.292$ ,  $P=0.749$ ). Scale bar = 30  $\mu$ m.

## Figure 5-figure supplementary 2

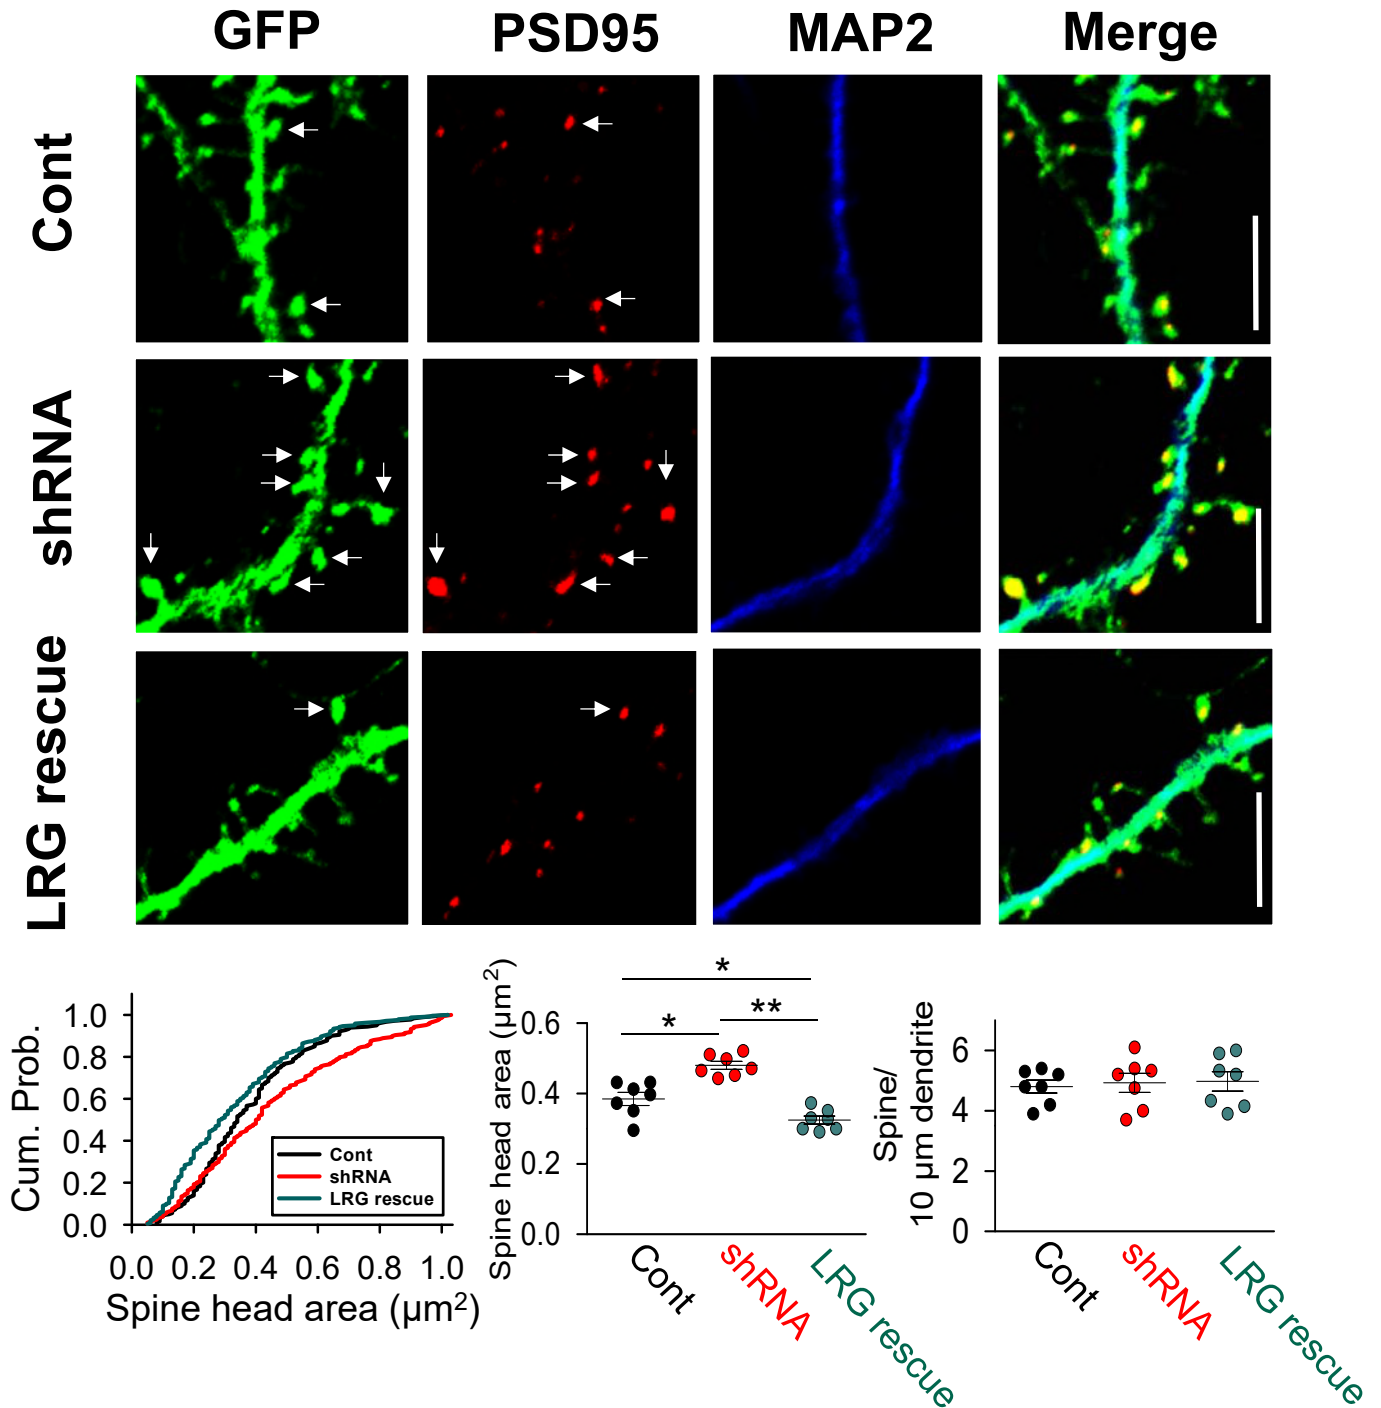

## Figure 6-figure supplementary 1

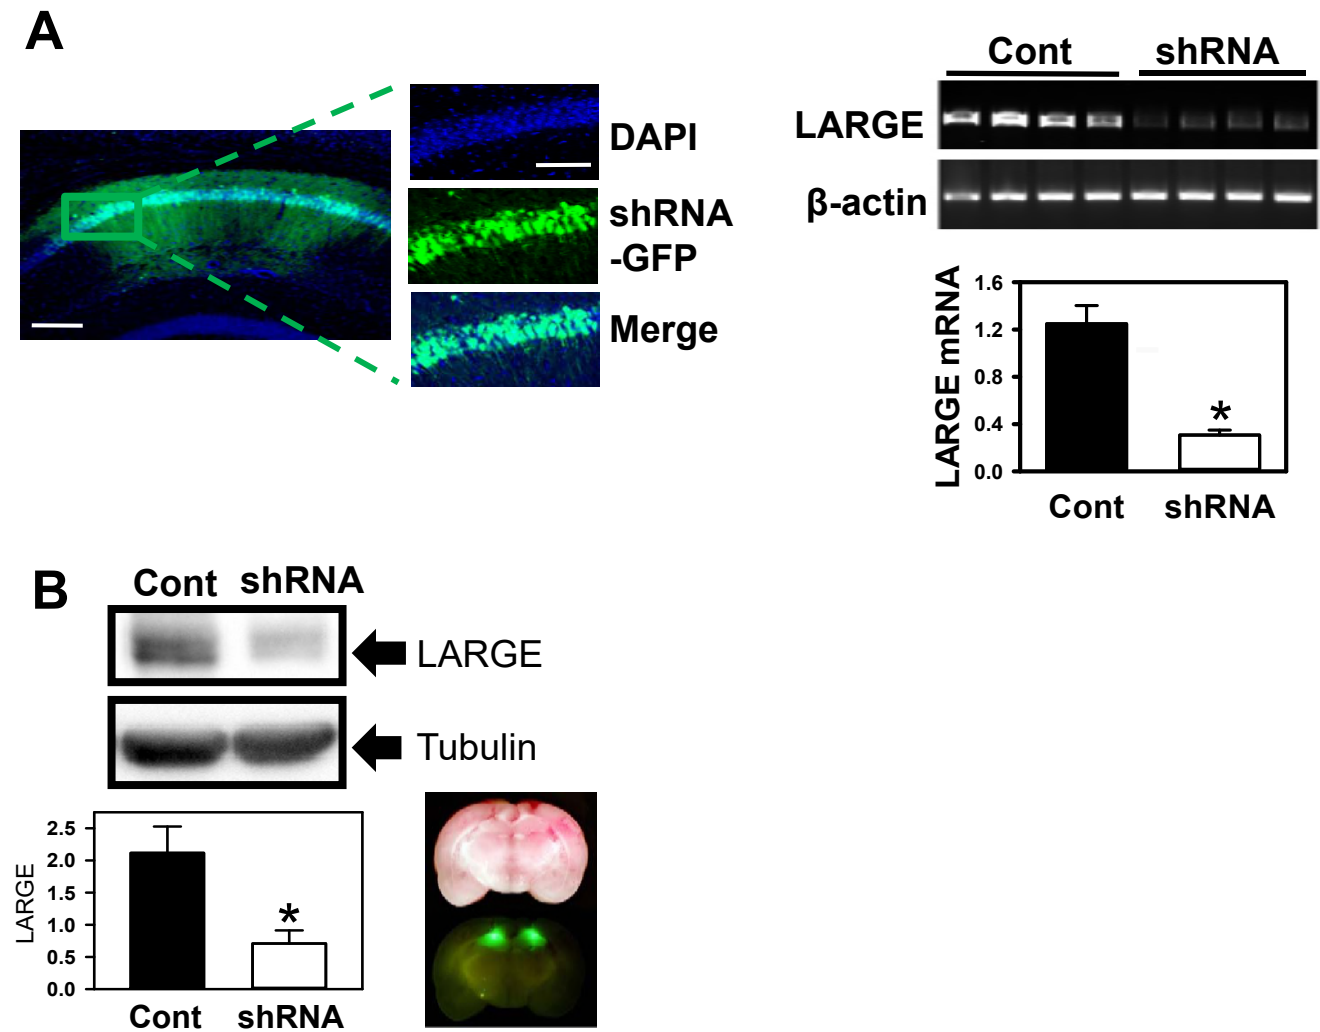

**Figure 6-figure supplementary 1** Confirmation of knockdown efficiency of LARGE shRNA after *in vivo* electrophysiology analyses and behavior tests. (A) Immunohistochemistry and RT-PCR analysis of mouse hippocampal CA1 region infected with AAV. Confocal images showed the location and diffusion range of AAV microinjected into CA1. Endogenous *LARGE* mRNA expression in CA1 was significantly knocked down by infection of AAV expressing *LARGE* shRNA with GFP (shRNA) ( $n = 3$ , 3 mice; Two tailed t-test,  $*P < 0.001$ ). Scale bar = 100  $\mu$ m (left), 50  $\mu$ m (right). (B) Digital image and Western blot analysis of hippocampal CA1 region of rat brain infected with AAV. Brain slices were imaged by digital imaging under a blue LED light. Strong and specific expression of GFP in hippocampi indicated specific delivery and expression of *LARGE* shRNA with GFP by AAV injection. Western blot analyses confirmed knockdown of *LARGE* in GFP-expressing hippocampi ( $n = 3$ , 3 rats; Two tailed t-test,  $*P < 0.005$ )

## Figure 6-figure supplementary 2

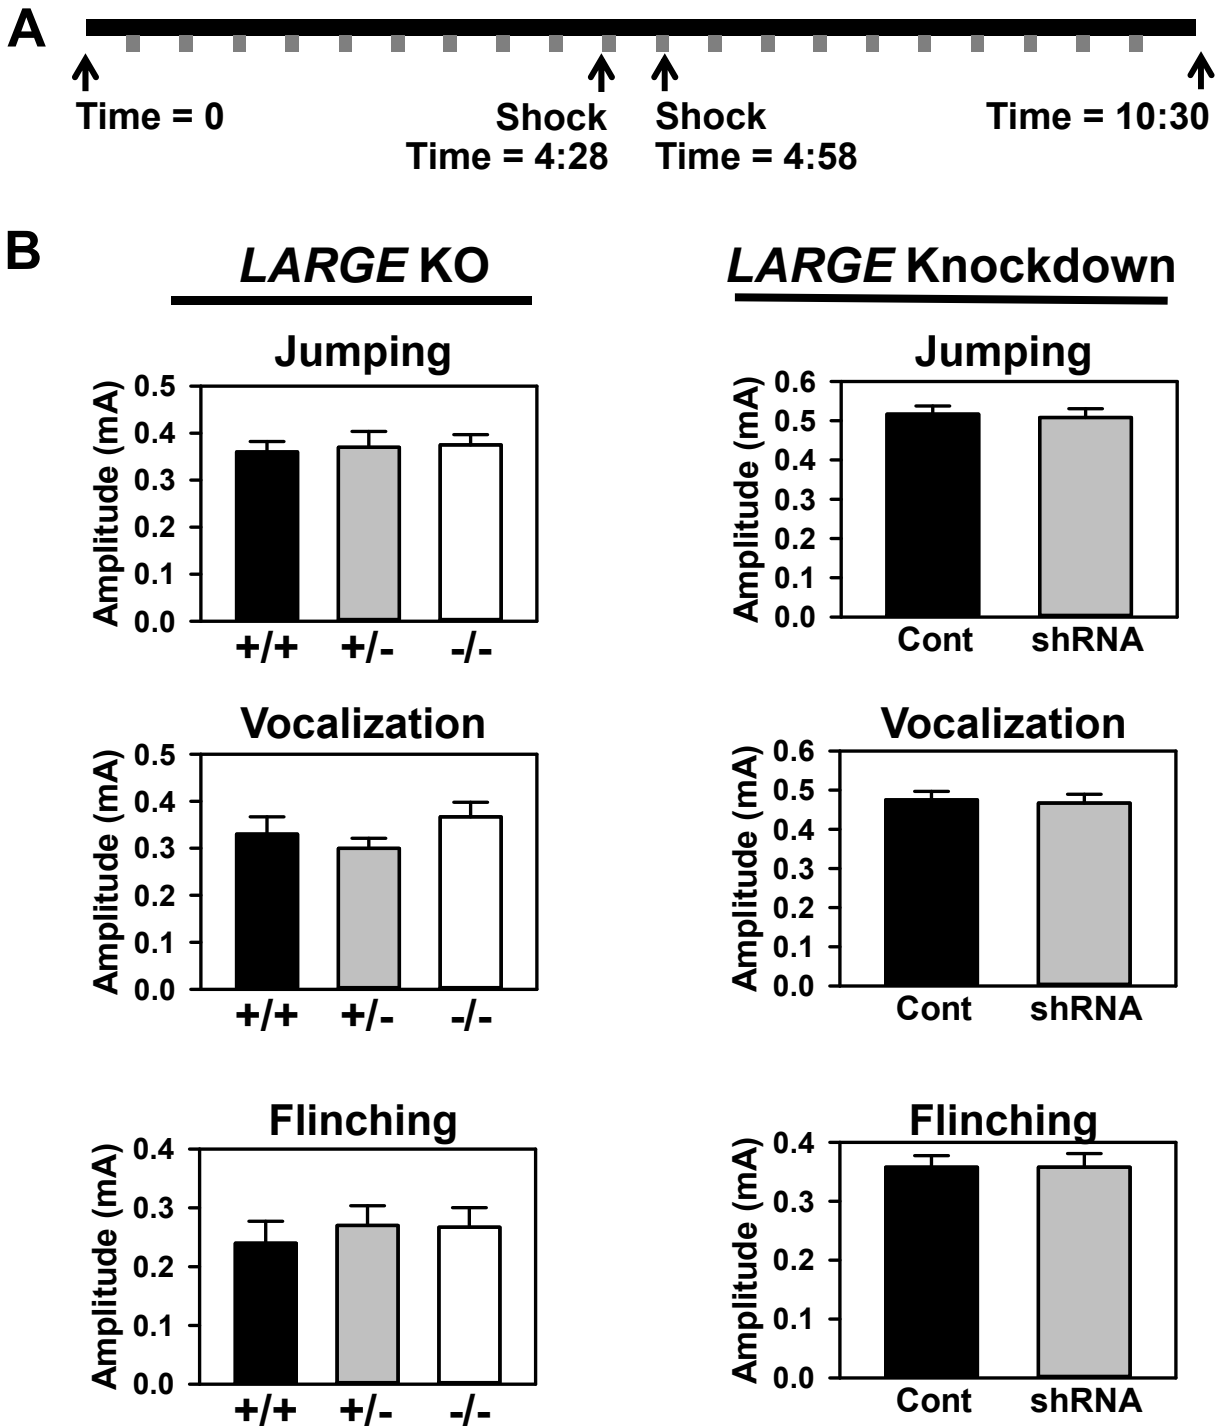

**Figure 6-figure supplementary 2** The absence of a significant difference in shock threshold among groups demonstrated that *LARGE* expression status did not affect fear conditioning. (A) Schema of shock threshold tests of animals. Shocks (gray blocks) were delivered every 30 s, with intensity increasing from 0.1 mA to 1.0 mA (4:28, 4:58) and decreasing back to 0.1 mA (10:30). (B) Regardless of genotype or injected AAV, all animals responded to shocks in a similar way. The shock intensity thresholds for jumping, vocalization, and flinching were measured for wild type (+/+), heterozygous (+/-), and knockout (-/-) animals and animals injected with AAV expressing scrambled shRNA with GFP (Cont) or *LARGE* shRNA with GFP (shRNA).
